# Supplementary material for: Genetic signatures of adaptation revealed from transcriptome sequencing of Arctic and red foxes
Source: BMC Genomics. 2015 Aug 7;16(1):585. doi: 10.1186/s12864-015-1724-9 (PMC4528681; doi:10.1186/s12864-015-1724-9)
Supplement: Additional file 4: Table S3. — Candidate genes identified to be under positive selection using pair-wise positive selection analysis. The gene functions are according to the Ensembl database. [file 12864_2015_1724_MOESM4_ESM.xls]

## Sheet: Additional_File3_Table_S3
S.No.	Ensemble Dog transcript ID	Gene Name		Function
1	ENSCAFT00000000446	CYP27B1	Cytochrome P450, family 27, subfamily B, polypeptide 1	Vitamin D metabolic process
2	ENSCAFT00000000799	SRFBP1	Serum response factor binding protein 1	Cardiac gene regulation
3	ENSCAFT00000004603	UBE3D	Ubiquitin protein ligase E3D	Proteolysis
4	ENSCAFT00000005363	TIA1	TIA1 cytotoxic granule-associated RNA binding protein	Apoptosis
5	ENSCAFT00000006665	DNAJC1	DnaJ (Hsp40) homolog, subfamily C, member 1	Chromatin binding
6	ENSCAFT00000009737	N.A.	N.A.	fatty acid synthase activity
7	ENSCAFT00000011901	PJA2	Praja ring finger 2, E3 ubiquitin protein ligase	Proteolysis
8	ENSCAFT00000012362	GGCX	Gamma-glutamyl carboxylase	Blood coagulation
9	ENSCAFT00000012454	ELMOD3	ELMO/CED-12 domain containing 3	GTPase activator activity
10	ENSCAFT00000015078	MTDH	Metadherin	Positive regulation of angiogenesis
11	ENSCAFT00000016240	CDKAL1	CDK5 regulatory subunit associated protein 1-like 1	Catalysis of a biochemical reaction at physiological temperatures
12	ENSCAFT00000021080	RNASEH2C	Ribonuclease H2, subunit C	RNA catabolic process
13	ENSCAFT00000022055	GGT1	Gamma-glutamyltransferase 1	Spermatogenesis
14	ENSCAFT00000024316	GPR161	G protein-coupled receptor 161	Signal transduction
15	ENSCAFT00000026684	ACOT6	Acyl-CoA thioesterase 6	acyl-CoA metabolic process
16	ENSCAFT00000027622	SWSAP1	SWIM-type zinc finger 7 associated protein 1	Single-stranded DNA binding
17	ENSCAFT00000030426	EEF2	Eukaryotic translation elongation factor 2	GTP-dependent translocation of the ribosome (Protein synthesis)
18	ENSCAFT00000031273	PER3	Period circadian clock 3	Circadian regulation of gene expression
19	ENSCAFT00000036898	PPP2R5E	Protein phosphatase 2, regulatory subunit B', epsilon isoform	Signal transduction
20	ENSCAFT00000037810	LMTK3	Lemur tyrosine kinase 3	Negative regulation of phosphatase activity
21	ENSCAFT00000048616	EXPH5	Exophilin 5	Intracellular protein transport
22	ENSCAFT00000043237	N.A.	WD repeat-containing protein KIAA1875-like	The selective, non-covalent, often stoichiometric, interaction of a molecule with one or more specific sites on another molecule
23	ENSCAFT00000045529	ZFP30	ZFP30 zinc finger protein	Transcriptional regulation
24	ENSCAFT00000048804	SHROOM2	Shroom family member 2	In the retinal pigment epithelium, may regulate the biogenesis of melanosomes and promote their association with the apical cell surface by inducing gamma-tubulin redistribution
25	ENSCAFT00000044251	OSGIN2	Oxidative stress induced growth inhibitor family member 2	N.A.
26	ENSCAFT00000047634	RAB11FIP5	RAB11 family interacting protein 5 (class I)	Protein binding
27	ENSCAFT00000047972	DDIT3	DNA-damage-inducible transcript 3	Transcription factor helps in variety of cellular stress response
28	ENSCAFT00000047018	KIAA0319	KIAA0319 ortholog	Involved in neuronal migration during development of the cerebral neocortex
29	ENSCAFT00000049951	SFI1	Sfi1 homolog, spindle assembly associated (yeast)	Plays a role in the dynamic structure of centrosome-associated contractile fibers via its interaction with CETN2
30	ENSCAFT00000047793	ARFRP1	ADP-ribosylation factor related protein 1	GTPase regulating protein trafficking between intracellular organelles
31	ENSCAFT00000043376	TUBGCP2	Tubulin, gamma complex associated protein 2	Microtubule cytoskeleton organization
32	ENSCAFT00000049659	ZNHIT2	Zinc finger, HIT-type containing 2	N.A.
33	ENSCAFT00000050085	DDX20	DEAD (Asp-Glu-Ala-Asp) box polypeptide 20	ATP catabolic process
34	ENSCAFT00000047467	TEFM	Transcription elongation factor	Nucleic acid binding
35	ENSCAFT00000046111	MTDH	Metadherin	positive regulation of angiogenesis
36	ENSCAFT00000032520	TK2	Thymidine kinase 2	ATP binding
