# Supplementary material for: Genetic signatures of adaptation revealed from transcriptome sequencing of Arctic and red foxes
Source: BMC Genomics. 2015 Aug 7;16(1):585. doi: 10.1186/s12864-015-1724-9 (PMC4528681; doi:10.1186/s12864-015-1724-9)
Supplement: Additional file 9: Table S6. — Selected microsatellite markers with their corresponding primers. [file 12864_2015_1724_MOESM9_ESM.xls]

## Sheet: ArcticFox
Sequence identifier	Microsatellite_motif	Product range	Forward primer	Forward Tm	Reverse primer	Reverse Tm
comp26428_c0_seq1	(TC)10	225	GTCACACCAATGGCTCTGGA	59.963	CGCTCACCCTAAGACTTGCA	60.037
comp72341_c0_seq1	(TG)10	178	AATTTGCAGACTCAACCGGG	58.752	GCTGTTAGCACAATGCCAATCA	60.095
comp73249_c1_seq1	(TA)12	243	TACCTTCCTCAGACAGGCCT	59.586	GTCTGCTATGGCCAACGTCT	60.108
comp74482_c0_seq1	(GA)11	236	CTAGTGTGGGACCAAGGTGG	59.675	CTCTCTCTCTCTCTCTCTCTCTC	57.548
comp75403_c0_seq1	(TC)10	150	AGAACCCAAACTCTCTGCCG	59.965	GCTCCAGAGAGAAGTCGAGG	59.262
comp92192_c1_seq1	(TA)10	109	GCTACAATTACCCAAAGCTGCT	59.245	TGCTGGATTTGCTAACTTTGGT	58.77
comp94223_c3_seq1	(GA)10	122	GGGTGATGGCAAAGAGAGGA	59.379	TTCTCCCTCTGCCTGTGTCT	60.179
comp102320_c5_seq1	(TC)12	168	CAGACAGCTCCAGGACAACA	59.606	GTGTGTGTGTGTGTGTGTG	57.326
comp18250_c0_seq1	(AAG)7	202	GCTGTACACTGGGCATAGCA	60.108	TGCACAGCACAAGGAGAGAG	59.966
comp26408_c0_seq1	(AGG)9	223	CTTCCTGAGCTTGTCCCAGG	60.036	CAGGTCGTTCCAGTCGGAG	59.787
comp26731_c0_seq1	(ATC)8	242	AGAATCCCAGTGGCAAGTGG	59.961	CCTGGACGTTTGTTCCCAGT	60.179
comp27059_c0_seq1	(ACA)7	176	TCGATTGCTTAAGGCCAAAGT	58.21	GTCCAGCCTATGTGCAGTGT	60.036
comp27311_c1_seq1	(TCC)7	209	GCAGCAGAATCTGGTCGTCT	60.108	AAAGGACTGTGAGGGCGAAG	59.965
comp27592_c0_seq1	(GCC)8	193	CACACACGAGGAGGGCTG	60.048	GAAGAGAGGGCGGGAAATGG	60.465
comp27701_c0_seq1	(GCG)8	193	TGAGGCTCTGAGGTACCGG	60.38	CCTGAAGTGGAGGAGGAGGA	59.958
comp27776_c0_seq1	(GGA)7	215	CTTTGTGTGTTCGGCCATGG	60.039	TCAGCTTGGTGTGGTAGCAG	59.965
comp27860_c0_seq1	(GCT)8	243	AGAGGCTTTCTGCTGTTGCT	59.89	ACCAAGTTCGGCTCAACCAA	60.107
comp27994_c0_seq1	(GCC)7	218	GCTGAAGGACCGCGACATT	60.742	GCGATCTGGAGACCATGGAG	59.967
comp28008_c0_seq1	(AAT)8	239	GCAAGAGGTGGCTAACAAGC	59.476	CATCCGTCAGCTGTCCTTGT	60.037
comp28021_c0_seq1	(CTG)9	181	GCCTAAACAAGCCGATGTGC	60.179	CCGGGCACTTTCCTTAGGTT	59.962
comp28037_c0_seq1	(GCC)9	198	GAGGTGTGGCAGGTTCAGAG	60.321	AGGGACTGAAGATGGGCAGA	60.253
comp28041_c0_seq1	(GGC)11	172	CGTGGACAGGTAGCTGGAAC	60.39	AGGTCCACTGTTACTGCGAC	59.683
comp28060_c0_seq1	(CGC)9	155	ATCTTCGCCGCTTCCTTTCA	60.036	CTTCAGCAGCAGGATGACGA	60.108
comp28077_c0_seq1	(CGC)7	150	AGAAGACGCCCATTCTCAGC	60.108	AGCTTCACCTTGTCGTAGCC	60.037
comp28131_c0_seq1	(GCG)10	246	CACTTGGAGCATGCTTTGGG	59.754	TCTTCTGCTCCGCCTTCTTG	60.037
comp28131_c0_seq1	(AGG)9	246	CACTTGGAGCATGCTTTGGG	59.754	TCTTCTGCTCCGCCTTCTTG	60.037
comp28131_c0_seq1	(TGA)7	106	GTGATTAGTGGTCGCGAGGT	59.827	CCTCATCACCACCTGTTCCC	60.035
comp28150_c0_seq1	(TTC)7	241	GGGCCTCAGGGTTAAGAGAC	59.458	GGGAGTGATGCCTGGAAACA	59.962
comp28188_c0_seq1	(GCG)12	231	CGCTGACCCTGGAGATGTAC	59.897	ACAGCTTCCGCCACATCC	60.046
comp28223_c0_seq1	(GGC)8	213	CCGTCACTTTGGTGGTCTCA	59.894	CGGTAGGTGCCGCTGAG	59.852
comp28259_c0_seq1	(GCT)8	189	TCCCATGATGCTGTTGCTGT	59.961	ATGGCCGTCTCTTAGCCAAC	60.108
comp28278_c0_seq1	(GGC)7	189	GCTGTCTGGTTGCATCCTGA	60.322	GCTTGTGGGCCACATCATTC	59.826
comp28310_c1_seq1	(CTC)9	232	AGAACCCGGCTTTGGATCAG	60.035	ACGAGCACAAGTACTACCGC	60.109
comp28328_c0_seq1	(TTC)9	248	AGGATGAGCAGGAGCCAAAC	60.035	ACGGCCCAGAACAAGATCTG	60.036
comp28423_c0_seq1	(AAT)7	222	CCTGAACTGGGCTATGGGAA	59.081	GTGCTTCGCTGTCTGGTAGA	59.756
comp28454_c0_seq1	(GCC)9	118	TTGTGTCGGATGAGGAGCAC	60.037	AATTCCTCGCACCGACAACT	59.965
comp28465_c1_seq1	(GGC)8	242	AGAGAAGAGCAGAGAGGGCA	59.959	ACAATGGCTCCAGCAGACTG	60.322
comp28484_c0_seq1	(GGC)9	235	TATGTCACCCAGCGAGCATC	59.895	GAGTTCACACCCGGCTTCG	61.028
comp28500_c0_seq1	(ATA)9	210	ACTTAAACCCTCTGTTTCTCCC	57.631	TGATCTGTAGGTCCGAAATGCT	59.234
comp28516_c0_seq1	(GAG)11	213	GCGCTACGTCTTTGGTTTCG	60.179	CGACGTAGCATCTCCCAGAC	59.97
comp28517_c1_seq1	(GCG)8	233	TACTAGTGTGAGGCCGGTGA	59.961	GCCTCTTCTCTCGCGTCTTT	60.109
comp28525_c1_seq1	(CCG)8	227	CTGGACCTCGTGGATCAGAC	59.542	CCGTAGAAGTCCAAGCCGTT	60.038
comp28538_c0_seq1	(GCA)7	233	AAGATCGTCATGGGCTGCAA	60.035	AGTAGACCATCCTGTCGGCT	60.033
comp28546_c0_seq1	(GAT)7	240	GAAGAGACTGGCAGACACCA	59.318	TGCACGAGCCATGTGTATGA	59.751
comp28564_c0_seq1	(TCC)8	181	CACAGAAATTCGCTGCTCGG	59.904	GCCGGACTCAGACTCAGACT	60.963
comp28575_c0_seq1	(CCG)7	200	CCCTTCTCAAACGCGACTCT	60.038	CATCTGCTCGCGAGTCTCTT	59.9
comp28609_c0_seq1	(GCC)9	245	TGATATTTGTTGCTGCGCCG	59.901	GGAGAGCTCCGAAGTAACCG	59.899
comp28938_c0_seq1	(CAG)8	133	GGAGGAGGTGGAGCTGTACC	61.331	CATCTCCTGGATCACTGCCC	59.892
comp29001_c0_seq1	(GCG)7	147	TTGCCTTTGAGGGACCCTTC	59.888	CTGGTCGCAGGATCGTCC	59.895
comp29056_c0_seq1	(CTC)7	248	TAAATCGCATTCCCTCCCGC	60.534	AGGGCAGATCACCACCTAGA	59.66
comp29070_c0_seq1	(CCG)7	206	AAGCCGAGGAAGGAAACAGG	59.963	CGCTGTTCTTGTCCATGTCG	59.56
comp29093_c1_seq1	(AAG)9	175	ACATGCCACCCATTGTGTCT	59.887	TCGGGACTATCCAACGGTCT	60.034
comp29268_c0_seq1	(TGT)8	105	TCGGGTTGAAAGAGCATGCT	59.963	TTAAACAACAACAGCCGCCG	59.97
comp30259_c0_seq1	(CCG)8	245	GACCTCCGACGCCGTTC	60.176	GTTTCGGACTGGCATGATGC	59.901
comp31157_c0_seq1	(TGG)7	247	ATCTTGCCCAAAGGACAGCG	60.962	CGAAACCAGGGCCTGCC	60.753
comp32476_c0_seq1	(CCG)7	147	TGCCCACGAAGCAGGATG	60.046	TCTCTGGAAGAAGGAGCGGA	59.96
comp33320_c0_seq1	(CTT)8	236	CCGGTGCCAATGACTTTGTC	59.759	CTCAGAGATGACCTTCCGCC	59.896
comp34267_c0_seq1	(CCG)7	141	ACAACTCGGACTCCCTCAGT	60.179	GGCTCATCAGGCCAAGAGTT	60.035
comp36438_c0_seq1	(CGC)8	184	TCGGAGAAACCAGGAAGGGA	60.179	GAGTTGGGACTGGGCTCCTC	61.905
comp37168_c0_seq1	(CTG)9	247	GGACTGCAGACAAGAGCCAT	60.036	GGTACCAGCGGAAGTCGTAC	60.179
comp38576_c0_seq1	(GCC)9	232	AGAACTGTTCCAACGGCCAA	60.107	GCGCTGGGAATAAGGGATGT	60.179
comp48068_c0_seq1	(GGC)8	163	GTCCCTGAGCAGCCATTCTT	60.035	GCTTCACCGCGGGAGAG	60.176
comp56694_c0_seq1	(TCC)8	187	GCTGAGGTCTCTGCCTACCC	61.681	CTGAGCAGAGACTGGAGCAG	59.826
comp57809_c0_seq1	(CAG)10	194	CCCACTTGGCCTTGGAATCT	59.96	CCGTGAGAGTGACAGCAGAC	60.388
comp60625_c0_seq1	(GAG)8	234	CGGCTGGAAGTCATCATCGA	59.897	CACCTTCCAGAACACCGTCA	59.894
comp60625_c0_seq1	(CAC)9	154	CCACCCTAGACACCTAGCCT	60.032	CATCCTGGGATGGATCAGCC	59.962
comp71575_c0_seq1	(TCT)8	232	TGCACATAGTTTGTTGCCCTG	59.387	CGGGAGGAGCTGCTCTATCA	60.825
comp72235_c1_seq1	(CCA)8	186	TGACACAGCAGTCAGGGAAC	59.893	GATTCAGACAGCAGCGTCCT	60.108
comp72901_c0_seq1	(ACC)8	243	ACAGAAGATGTGCACTGCTGT	60.203	ACACTTAGCCCGTTCATCAAGA	59.698
comp73209_c0_seq1	(CGC)9	125	GATGACTTCCACCTGCCTCC	60.107	GATCGACTACTCGGCCGAAG	60.041
comp73358_c0_seq1	(GCT)10	177	CCGCAACCATCCAGCCAT	60.441	ACGTCCACCTTGTGCATCAT	59.963
comp73453_c0_seq1	(TCC)7	232	AGGGAATTCGAACACGTCCC	60.037	CTCCGGGACCAAGAAGACAC	60.037
comp73453_c0_seq1	(CTC)10	232	AGGGAATTCGAACACGTCCC	60.037	CTCCGGGACCAAGAAGACAC	60.037
comp74016_c1_seq1	(CAG)8	233	AGACGCTAAGATGGCAGAGC	59.896	CACTGCCACGAGTCTTCTGT	59.967
comp74090_c0_seq1	(GCG)8	244	TCCGACGATCAAACTGGCTT	59.68	AACTGATCGACTTCCAGCCC	59.749
comp74115_c0_seq1	(GCC)8	104	TTTCTCTGTCCTCTCGGTGC	59.396	AGGCTGTGAAGAAGAAGGGC	59.963
comp74115_c0_seq1	(TTC)9	131	GCCCTTCTTCTTCACAGCCT	59.963	GGTTGGGACTGGCAGAAACT	60.179
comp74179_c0_seq1	(GCC)8	135	GAGGAAGACCCGGTACTCGA	60.394	CTCGTCCTTGTCAGCCGG	60.126
comp74181_c0_seq1	(CGG)8	236	CTTCTCCACCAGCCGGAAG	60.079	TGTCCTGGTTCCTCCCTGAA	60.105
comp74197_c0_seq1	(CCG)9	166	AACAACCAGGAGAACGCGAT	59.965	GGCAGAAGCTCATGGCCA	60.045
comp74221_c0_seq1	(CGC)7	177	GTTCCGGGTGATAAGGTGCA	60.036	GAGCGACGAGTTCAGCTGAT	60.179
comp74464_c0_seq1	(TGC)10	226	AAGGCATGCTTGGACTACCC	60.034	GCGCCATCTTCTCCTCACTT	60.108
comp74489_c0_seq1	(GGT)8	186	AAGGGAATGTGGAAGGCTGG	59.96	CGCGCAGTACAGAGTGATCT	59.9
comp74489_c0_seq1	(GCT)10	186	AAGGGAATGTGGAAGGCTGG	59.96	CGCGCAGTACAGAGTGATCT	59.9
comp74794_c1_seq1	(GGC)9	224	GGGTGGACATCGACGAGTTT	60.038	GGTAAGCACCTTCAGCACCA	60.251
comp74990_c0_seq1	(AGC)7	234	CTTCTGGATCCGACACTGGG	59.823	CAGGTGCAAATGAGCCACAC	60.039
comp75071_c0_seq1	(GCC)8	245	TTCGTTGTGCGTGCTCTTTC	59.697	CCAATTTCATGGGCGGCATC	60.25
comp75165_c1_seq1	(TGC)12	248	GTTCCCACTCATCCTGGCTC	60.107	AGAGCGGCTCCATCAAGAAC	60.108
comp75301_c0_seq1	(CTG)9	156	CCAGCCTTCTTTCACAACGG	59.407	TGCAGGCTGAGTCATCACTAG	59.52
comp75316_c0_seq1	(GGT)7	115	CCCGAGAGCTATTCCTGCTG	59.967	GGACCCGACCCTTTCAGC	60.046
comp75339_c0_seq1	(GCT)8	151	ACAGTTGTTCTTGGGCGACT	59.82	GGGAAGAAAGGATGCTGCCC	61.04
comp77753_c1_seq1	(GAG)8	219	ACGAATCGTGCTACTGGCTG	60.459	GAATGGGAAAGGGTGGAGGG	60.033
comp77753_c2_seq1	(TCC)8	160	GGTGCAAGACAGTGACCTACT	59.655	CTGGGTTCACCACCTTCTCC	59.963
comp78171_c1_seq1	(TCG)9	223	GGTCTTCATTGTCTTCCTCTTCCT	60.02	TCTGTCCCACTTCCCACAGA	60.105
comp81275_c0_seq1	(CAA)7	100	CCACGAGACACCGCTATACA	59.263	CCCAGCACTTGATGTTGTCAG	59.461
comp84516_c0_seq1	(GAG)7	153	GCTATGGGATCCCTTCAGCC	59.963	ACACCACCGATGTTCTCGTC	60.039
comp87711_c0_seq1	(TCC)7	228	AGAGCAGCTAAAGGCCTTGA	59.013	CTGTGTCCGAGAAGTTGCCT	59.966
comp87817_c0_seq1	(CAT)8	125	TGGTTTGCTCAGCTCTCAGG	59.964	CTGTGAAGCAGCAGGTCTCA	59.966
comp89352_c0_seq1	(CGC)9	222	CCGGCCTGAATCTGCTCTAG	59.967	TGCGTTGAAAGCAGCAAAGC	60.871
comp89498_c2_seq1	(GCG)11	163	CCTTCTCCTCATCGGACAGC	59.896	CCGTAGGCATCGTTGAGGTT	60.108
comp89507_c0_seq1	(AAG)7	193	CAACGAGAGGCAACAAACCC	59.689	TTCTGTCCTCTCTGCCCTGA	59.885
comp90060_c0_seq1	(GGC)8	248	CTCTTTGTGTGGTGCCCAGA	60.179	TCGCCGTTATCGTTGGCTAA	59.827
comp90060_c0_seq1	(GGC)8	194	CCGTGCCCAAGGAGGATATC	59.965	TTCTTCTCTGTCGCCACCAC	59.966
comp90060_c0_seq1	(CGG)10	199	CCGTGCCCAAGGAGGATATC	59.965	CCTCCTTCTTCTCTGTCGCC	59.825
comp90684_c0_seq1	(GCT)9	237	GGAGCCTGACTGCTGTCTAC	59.825	CGTCAACGAGCGCAAAGTAG	59.909
comp90684_c0_seq1	(TGT)8	109	CTGTTGTTGTTGCTGCTGCT	59.898	CGTCAACGAGCGCAAAGTAG	59.909
comp90809_c0_seq1	(TTC)8	196	AGAGATGGCTAACAATCTGTGAAGA	59.811	AGCAGAAATATCAAAGCTTTAGGCC	59.932
comp90810_c0_seq1	(GAC)10	219	CAGCAGACCAGAACCTCAGG	60.037	CATCATCCTCCGACATCCCG	60.038
comp90970_c0_seq1	(CCG)10	174	CACCAAGGACCGAAGTACCC	60.037	CTGGAAAGGGAGACAGAGGC	59.748
comp91424_c1_seq1	(GTG)8	125	TGTGTGTGTGTGTGTACGTGT	60.337	CAGATGTCAAGGGCAAGGGT	59.961
comp91489_c0_seq1	(AAC)8	208	CGGTGCCACCTCTGATAGAC	59.897	GACCGAGCTCAGAATCCAGG	59.896
comp92264_c0_seq1	(CTC)12	165	GTAAACAGCGACGGCAACAA	59.695	TGGGAGAGCAGAACTGGAGA	59.885
comp92404_c1_seq1	(CCG)8	236	TGCAGCTGGTACTGTAGCAC	60.037	TACCAGCCCTACGAGATCCC	60.179
comp92437_c0_seq1	(AGC)9	167	TAGTGGTAGCGCACGAAGTC	59.83	GAACCGCAACCGAGGGAA	59.969
comp92908_c0_seq1	(CAG)7	198	AGCTTCTCCATGCGGAACTC	60.108	CCAAAGGAGGAAGATGGCGT	60.035
comp93105_c1_seq1	(CAG)8	213	TTTGTTCCAGGCACCCTCTC	59.89	TTGTAGGTGGAGCTGGTTGC	60.251
comp93535_c1_seq1	(GCG)9	239	TTAAAGCCAGCTCAGAGCCC	60.035	TTGCTGTAAGCCGGTGACTT	59.892
comp93745_c0_seq1	(GAA)9	249	CACCCACACCTGAGGAAGAC	59.965	CCTGTCGTGACCAAATGGGA	59.964
comp93901_c0_seq1	(CGG)7	225	TAAACATTCCTGGACCCGGC	60.035	CAAAGCCTCTGGGACCTCTG	60.036
comp94096_c2_seq1	(GCA)10	197	GCAAGGACTTCAGCACAAGG	59.405	CACGTCTGTCTCTTGGCCTT	59.966
comp94271_c0_seq1	(TGC)7	219	AGCACAGACACGTTCCTCTG	59.967	CCAGAGCGAGTGGAGCG	59.854
comp94271_c0_seq1	(CGC)9	219	AGCACAGACACGTTCCTCTG	59.967	CCAGAGCGAGTGGAGCG	59.854
comp94732_c0_seq1	(CCG)7	219	GTGTGTGGCTCTGTCTCTCC	60.038	GATGCCACACATGCGAATCC	59.97
comp94943_c0_seq1	(GAG)7	220	GGAAGAGCCCAGAACCAGAC	60.036	GAGACCAGGGCCAGTTTCTC	60.036
comp95027_c0_seq1	(GGA)8	199	TGGGTTCTTCTGCTGCTGAG	59.964	TCCAGCCTCAGGAGACGTTA	59.961
comp95415_c0_seq1	(GCA)10	245	AAGCCCTGTCGGAAAGCTAC	60.036	CGGGCTTTCTCCCTGGAATT	60.034
comp95593_c1_seq1	(CCG)9	115	CCCTTCTTCTCGGACTGCG	60.154	ACTTGTACCAGCAGCTGACC	59.965
comp95821_c0_seq1	(GGC)7	211	CAGGAAGAGGGACAGCACG	60.08	CGACCACCTGGAGAAGCAG	60.08
comp95922_c0_seq1	(GCG)8	200	GGGCCTTCTGCTCAGTTGC	61.339	ATCTTGCTGTGGATCCCAGC	60.107
comp95931_c0_seq1	(AAG)8	245	GGGAGAGGGTTGAGAAGCTG	59.748	ACAACATTGCTAGGCCTGGA	59.302
comp96062_c0_seq1	(CTG)10	152	TTCTGTCCCTCCTCTGTCCC	60.252	GGTCTCCTTGTTCTCCAGCC	60.036
comp96388_c0_seq1	(GCC)9	152	CTCGGACCACAGAAACACCA	59.894	TAACACATGACGCAGCCCAT	60.036
comp96502_c1_seq1	(TTC)7	208	TCCATTGCTTTGCGGTGTTT	59.25	CCCAACAGTCAGAATTTGTCCC	59.442
comp96624_c1_seq1	(CCG)8	171	GCAGTACTACCTGATGGGCG	60.249	GGTCCACCTTACAAGCGACC	60.673
comp96753_c0_seq1	(GCT)12	198	CTTAAGCTCTGCTGGGTCCC	60.107	CAGTAGTGGAGGTGCTTGGG	60.036
comp96772_c0_seq1	(CCA)8	240	GCACTAGGGAGGCTCTTCAC	59.823	AGCCTGGCGGAAAGTTCTTG	60.891
comp97042_c0_seq1	(TGC)8	214	GTGAAATGCCTGCCATTGGG	60.108	TGTGAGGAACAAAGAGGCCC	59.89
comp97600_c0_seq1	(GAG)11	242	CTCCTCTGCTCCTGTCTCCT	60.033	TGCTTCACCTTGTAGCCAGG	59.963
comp97600_c0_seq1	(GGA)10	204	GGAGGAAGAGGAGGAGCCA	59.998	AGGCACTGGTTGAAGCTGAA	59.817
comp97828_c2_seq1	(GGC)10	215	TCTCATCCTGAATTGCCGGG	59.819	CAGCCATGAACCGGTTTGG	59.414
comp98097_c0_seq1	(AGC)7	200	AGTGCGTCTTCTACAGCGAC	60.11	GAGCTTCTCCACCAGGCTG	60.079
comp98422_c0_seq1	(GGA)8	181	AGTGCCTGTGTGAGTTCCTG	59.893	GTGGTCTGCTCATCAGCCTT	60.036
comp98541_c0_seq1	(AAC)8	238	TCCTCTAAGTGCAGGTGAGA	57.395	GCAATGTTAACGTATGCAGGCT	59.903
comp98550_c1_seq1	(GCC)10	222	GTCGCATTTCCACAGCAGTG	60.11	GCTGGTAACTTGTTGTGCGG	60.04
comp98979_c0_seq1	(GCC)8	134	CCTCTCCTCTCAACCTGCAG	59.464	TTCTTTCCGTGGTCACCCAG	59.892
comp99613_c0_seq1	(GCC)7	237	GAGATGCCGCTGCTCCTG	60.588	AAACTCCTGGTTGAGCAGGG	59.889
comp99754_c0_seq1	(CTC)8	231	CTGAGGAACTTCTCGCTGGG	60.108	GACCGTCGAAGAGCAGCTG	60.804
comp99856_c1_seq1	(GCC)7	218	GGAGTTTGGAAGCCATTGCC	59.753	CTTTCTCCGCCTTCGAGCC	60.812
comp99921_c2_seq1	(CCG)10	235	ACCTTTCATCACCCGCCTTT	59.888	GATGGTCAGATAGCTCCGGC	60.038
comp100134_c1_seq1	(CAA)9	250	AAACAAGACACCACGAGGCA	60.107	TGATCTACGCCCTCCACTGA	60.034
comp100420_c6_seq1	(CAG)8	168	AGAGCAATCACAGCAGACCC	60.036	CCAAGAGGCTAAGGCAGTGT	59.674
comp100536_c3_seq1	(GCC)7	107	ATGCTGGACATGTCACTGCA	59.963	TCTCGTTCCTGTCCCTCGAT	60.034
comp100871_c0_seq1	(AAC)8	150	AGAGTCTGCAGTCCAGTTGC	59.965	GTCTCTTTGGCGGAGATGCT	60.108
comp101022_c0_seq1	(AGG)7	217	ATACGAGCAGTACATCGGGC	59.686	GTCGTCCTCCTCTTCCTCCT	60.034
comp101070_c1_seq1	(GCA)9	209	CTTCAAGAGGTGAGCCAGGG	60.036	GGACTTTCCTCCGCTTTCCA	59.964
comp101171_c4_seq1	(AAC)9	238	TGCTTAGCAGCCAGAAGCAT	60.035	TGTTGTGTATCTAGCCTCTGAGG	59.298
comp101309_c4_seq1	(GGT)10	127	TGGGAGACTGTAGCTGTCCT	59.59	CACAGACTGGCGATTCCCTT	60.036
comp101460_c0_seq1	(CGC)7	172	ATCCAACCACAGCGTCGAAT	60.036	CTCTACGGAGCAGAGCGGAG	61.781
comp101672_c6_seq1	(GCC)7	204	CTTCGCCCTCTGACCTTTCC	60.392	GTCCGTTCCGAACCTCGAC	60.443
comp101710_c2_seq1	(AGG)7	239	CTTCTGACGACGGGAGGGAG	61.659	CCTCCTAGTCTCCGCCTCG	60.895
comp101866_c0_seq1	(GGC)7	148	CCCTCTCCTCAGTCCAGGAA	59.958	CGACTTGCGCTCAGGCA	60.418
comp102248_c1_seq1	(TTG)8	232	CAGGACAGAGAGCCAAGTGG	60.037	GACTGAGAGAGCACACACCG	60.388
comp102296_c9_seq1	(GCG)8	164	AGAGAGAGAGAGCCCAGAGC	60.107	GAGCGAGGAGGCTGCTG	59.85
comp102399_c0_seq1	(TGA)13	164	TGCAGGATGCTCGGAAACAT	60.035	TGGAAAGCACAACTGAGGCT	59.817
comp102406_c0_seq1	(GCC)7	228	GCGGTTTCCTGCTTCAACAG	60.04	GTCCTGGTGGTAGTTCTGGC	60.036
comp102440_c0_seq1	(GCT)9	237	AGCCAATAGCCAAGACCGAC	60.108	CTCTCTGCCATGGAGTTGGG	60.107
comp102450_c0_seq1	(TCC)8	192	CTCCTCTTCTTCCTTGCGCT	59.751	CTCTGGCAGGTCAAGTCTGG	60.037
comp102473_c0_seq1	(CCT)8	102	TCAACCGACATTCCCATGGG	60.035	AGTCAGATTGTGGCCAACCC	60.251
comp102495_c0_seq1	(GGC)9	243	GTCGGACTGCGGGTCTC	59.447	CCCTTTCCTTTGGAACCCGA	59.888
comp102508_c0_seq1	(GGT)10	220	GCCTTAAACCTGGCTCCAAG	58.823	CTTCCGGCTGGGCTCTTTAA	60.035
comp102541_c0_seq1	(CGG)11	246	TGCCCAGAGTAAGTTTGCCC	60.251	TAGACTCCCTTCGAGCCACA	59.961
comp102557_c0_seq1	(GCT)7	221	CAGGGAACAAAGTCCCGTCA	59.892	CGTCAGCACAGCCATTAGGT	60.392
comp102571_c0_seq1	(AGC)10	246	CACCACAAACACTGCTGCTG	60.249	AGGGTCTCCTTCCTGCCG	60.685
comp102658_c0_seq1	(GCA)11	250	AGGTTCCTCCTCCTCAAGCT	59.882	CTGCATCCTCGGTGCCTG	60.513
comp102715_c0_seq1	(TTG)8	167	CCAATTCCCTGTCCTGCCTT	59.96	GGAGTGACCAGGAGCAGATG	59.822
comp102723_c0_seq1	(TTC)7	223	TGGGAGATCTCGAGCTGGAA	60.033	CAGTACCAGCCCAAGCATCA	60.035
comp102728_c0_seq1	(GCG)8	189	TGGTTGGGTCGTAGGAGTCA	60.179	GCCGATCGCAGCACAGG	61.295
comp102738_c0_seq1	(ATC)8	179	GGGCAGCAGCAACAGTTAAC	60.039	ATTCCACGTCCCATCCTCGA	60.686
comp102751_c0_seq1	(CTC)7	213	TGGCCTTCCTGTTATCGCTC	59.822	GGTTCTCGAGGCCTGCTG	60.125
comp102766_c0_seq1	(GCC)8	242	CAGCTTCCTGGAGCTGTTCA	59.964	CCTCATCCTCCGTCTTCTGC	59.896
comp102787_c0_seq1	(AAG)7	221	TGCAAGAGTCTAGTGCGGTG	60.038	TTTCTTCCGTCTGGGCATCC	60.035
comp102804_c0_seq1	(GCG)7	229	AAGCAAGCCCAAGACGATCA	59.963	GAGCTCTATCCAGCAGCAGG	59.966
comp102849_c0_seq1	(GGC)7	155	AAGTTCCAGGCGCGGAAG	60.359	CGGATGCTGACCTCCAGATC	59.967
comp102874_c0_seq1	(GCC)7	133	GGATAAGACTCAGCCTCGCC	59.967	TCAAGTTCTGGCCCATGACC	59.962
comp102881_c0_seq1	(CGC)7	214	CGCCAAGAGACGTGTGTTTG	60.042	ACACTTGTCCATCCGCGTAG	60.109
comp102882_c0_seq1	(GCT)9	170	GACCGCTTCACTGGGCAATA	60.392	CCGTGTGTGGTTACTGAGCT	59.966
comp102899_c0_seq1	(GGC)7	175	GCACTCGATGATCCAGTGCT	60.179	CCTGCAGATCCTGGGCAAG	60.453
comp102903_c0_seq1	(GGC)8	211	GCATCCCATGGCTTCTCTGT	60.107	CCATCACGTGAGACTGGGAG	59.826
comp102924_c0_seq1	(GGC)7	175	CTCTCCTGCAGCCCATCTG	59.854	CTGATGATGCGGTCGGTCTC	60.596
comp102953_c0_seq1	(CCA)8	206	GTGGAGGTAGGCAGGGTCTA	60.032	CGGTAGCAGCCATGATCCTC	60.32
comp102984_c0_seq1	(CGC)7	186	ATACACTCCCGAGGCTTCCT	60.032	GAATCCGGAGTGGCGCTC	60.586
comp103001_c0_seq1	(ATG)7	190	AACATGGTCTGCGTGCCTTA	59.964	TCATCAGCAGGTTGAGCAGG	60.036
comp103056_c0_seq1	(CCT)7	107	CAGAAGTGCCGGGACTCTTC	60.39	ATCCGGTCTGAATGTGCCAG	60.108
comp103061_c0_seq1	(AGC)7	240	TCTTCTCACAAGACAAGACACA	57.264	GATCCTGATGTGCTGGTGCT	60.107
comp103138_c0_seq1	(GCT)8	146	TGCTGCTGCTGCTCCTG	60.011	GCAGAGAAGGAGAAGGAGCG	60.179
comp103155_c0_seq1	(CAG)8	189	GCTGTAGGCTGTCTTCCGTA	59.184	TGCAGGCTCCCGAGGTC	61.096
comp103162_c0_seq1	(GGC)7	148	GGCTCTGGTCTCCCACCT	60.285	TATGGTCGCTTCCTTCGGTG	59.825
comp103174_c0_seq1	(CCA)8	189	TCACCTGTCTTGGCCACATC	59.963	GAGCAGCACCTTAGCGAAGA	60.109
comp103236_c0_seq1	(CGG)8	100	GCTCCCAACGCTGAAGTACT	60.037	CGGGTGAGGAGGCGGTA	60.426
comp103239_c0_seq1	(CCG)8	151	TAGGAGATGTCCACCAGGCA	59.957	CTCTTCTCCCAACCAGCTCG	60.108
comp103242_c0_seq1	(CCA)8	177	GACCTACACCAACCACTGCA	59.892	TGGTGGGAGGGATGGGTG	60.614
comp103324_c0_seq1	(GGC)9	247	CGAAGCCTTTCAGTCAGGGT	59.965	CCAAGTTCAGCAGCCGGT	60.282
comp103437_c0_seq1	(TGA)9	231	GCTGATGCCGTGTCTTCATG	59.624	AACGAGCTCTCTCCACTCCT	59.961
comp103458_c0_seq1	(CCA)8	221	TGGTGATTGGTCGGTCACAG	59.965	TCTGAGGCTAAGCTGACTGC	59.466
comp103493_c0_seq1	(CGG)8	201	CTTGGTCGGGAATCACACCA	59.964	CGTACCCGACCTACCCAGTA	60.107
comp103539_c0_seq1	(AAG)7	230	ACTGAGAGTCATGCGTTCTGT	59.384	CTTCGGGTGGTTACTTCCGT	59.681
comp103639_c0_seq1	(TTG)10	175	CTTTGGCTTGTTCTGGTGCC	59.967	TAGAGCTCCTCCCTCCGAAC	60.107
comp103671_c0_seq1	(GAG)8	234	GAGGAGGACGAGGAGGATG	58.273	TGTCGCAAGTGAAGGTGAAGA	59.862
comp103691_c0_seq1	(TAT)8	103	GGAGGAGTGGCCACATTTCA	59.962	ACTTGCCAGCTCCTTAGAGTC	59.447
comp103726_c0_seq1	(GGC)9	116	GTCGCGAATCATCCAAACCG	59.974	CGCGAACGGTAAGTGCC	58.831
comp103830_c0_seq1	(ACC)8	220	GCCTCATGCTGCTCAAATGG	59.898	CTAATCCGGTTGGGCGTCC	60.523
comp103833_c0_seq1	(CAC)8	121	TCACTCAGAAGAGCAGCAGC	60.038	TTGCTGAGGTACCGTTTGCT	59.892
comp103861_c0_seq1	(TCC)10	189	AGTTCGAGTCCAAGTGCTCG	60.039	CTGTCCATCTCCGACGACTG	59.9
comp103882_c0_seq1	(CCG)8	139	GACGAGGCGGAGAAGGC	59.852	AGAAGGAGCGCGACTTTGAG	60.389
comp103975_c0_seq1	(ATT)9	219	TGTGCAATCTGAAAGCCTGT	58.015	ACAATACCACAGAAACAGCACT	58.179
comp104143_c0_seq1	(CGG)9	121	CTCGGAGGAGCAAGTGTCTG	60.109	GTGATGAAGGCGCTGAACAC	59.833
comp104157_c0_seq1	(GGA)9	139	CTTCCGGGCCCACTTCG	60.094	CAGCAGCGCGAACCAGC	62.229
comp104215_c0_seq1	(TGG)7	208	ACACTACCTGACCTGGTCCA	59.81	CTGATCGGCATGTCCCACTC	60.532
comp104508_c0_seq1	(GCC)9	100	CGAAGTTGGAGAGAGGCACC	60.39	CCTCAAGGACAGCATACAGGT	59.443
comp104581_c0_seq1	(CTC)7	200	ACCGGTGCTGCAATATTGGA	60.035	GGGCTCATGGGAAACTCTGT	59.67
comp104640_c0_seq1	(GGC)7	235	GCCCACGTACGACGAGAAG	60.514	CTACTTGTACCAGCCGTCCG	60.179
comp104643_c0_seq1	(GCC)7	217	GGGATGTAGTGCGGCTTCTT	60.108	CCAACAGGGCTGAGCGAG	60.436
comp104800_c0_seq1	(CCT)8	177	GGTGGAGAGCAACAGTGGG	60.303	GGAGGAGGAGGAGGAGGAAG	60.106
comp104849_c0_seq1	(TCC)7	103	GCAGGTGAGGCGCGAAA	60.743	CTCGCGGCTCAGATCATCC	60.373
comp105181_c0_seq1	(TTC)8	191	AGATGCATGGACACTGTGGG	60.035	AGAAGAAGCTACCAAACGGCA	59.928
comp105374_c0_seq1	(CCT)9	234	ACTTGAACTGCACACTGGCT	60.107	CTCTCTCCCTCCACCTCTCC	60.106
comp105528_c0_seq1	(AAC)7	190	GCCGTGCATGGTAGACTAGG	60.249	CGAGAATTCCAAGACCTCAGT	57.399
comp106392_c0_seq1	(GAA)7	245	TCATTCATAGACATCTCCCTCCCT	60.141	GCATTGGCCAAAGCAAGTCA	59.966
comp106450_c0_seq1	(CTG)7	185	CCACTGGCCTTGACACAGAT	59.963	CGTCCCTCTGCATCCAGAAG	60.179
comp106653_c0_seq1	(ATG)11	134	AGTGTCTTAAATGGGCAACAGT	58.167	AGAGTCGTGACTGCGGAAAG	60.039
comp107300_c0_seq1	(AGG)8	193	CAGCTGTGAGACCAGCTTCA	59.966	TTCACTGTCTGTCGAGGTCA	58.312
comp107939_c0_seq1	(ACG)8	103	CATCTCCACGTCGCTCAACT	60.109	GCTTTGGCTTGGGTTGCATT	60.25
comp108549_c0_seq1	(ATA)8	180	TCTCTCTCTCCCTCTGCCC	59.382	ACACTCAGAATTATTCCACTCCACA	59.987
comp108670_c0_seq1	(TGC)9	204	GACACCGACACTGCCTTACA	59.967	TTGCCTCCTCTCCTTTCCCT	60.179
comp109188_c0_seq1	(GCT)8	168	CTACCACGTGCTCAGCCTG	60.447	CTGAGCACCGTGGTGTAGG	60.08
comp109320_c0_seq1	(CCA)9	179	CCGACCCGACTGTATGGATG	59.968	GTTCCAGAAGTCAGGCTGCT	59.964
comp109829_c0_seq1	(GGC)9	132	GAGCACTCAGTCCGTTTGGA	59.966	CAGCAAGAACTCCAGCCTGA	59.964
comp111207_c0_seq1	(GGA)8	155	GGTTGCTGGGACTTGCCTTA	60.251	TGAGTGAATTCCCAACAGCAGT	60.159
comp111225_c0_seq1	(CCA)8	100	GCTCTAGGTGCTGCGGTG	60.51	TTCCTCAGGAGAGCAGAGCT	59.959
comp111659_c0_seq1	(GGC)9	147	AAGAACATTCGCCCTCCTCC	59.747	ATTCCGCCAAGCCCGTTC	60.75
comp111908_c0_seq1	(TTA)7	229	GGCAGAAGTGGAAGCTGAGA	59.677	CCGAAGCTCCCACTTATTCT	57.01
comp112070_c0_seq1	(GTT)8	193	CCGCGTACGTGTATCCGTT	60.226	CCTTTCTCCAGCTACCGCAA	60.036
comp114605_c0_seq1	(GGC)7	212	CTGGGCCAGAAGCTGAGC	60.438	GAGCTCTTGGGCCAGAAGG	60.078
comp118760_c0_seq1	(GGC)7	138	AACACATAGCTGTCCCTGGG	59.379	TACGTGAAGGGCTGCGTG	60.049
comp122193_c0_seq1	(AAG)7	154	GAAGTTGTGGGCTCCATGGA	59.962	GTCTTCCTCCTCCTCCTCCT	59.366
comp123339_c0_seq1	(GAG)9	155	TCTCTCGGGAGACTTCCAGG	60.034	CCTCCTCACCGCCTCCT	60.006
comp126309_c0_seq1	(GGC)7	213	GCCTCCAAGACGGCAGAC	60.435	GCAGAGAAGGCCTGGGATTT	60.034
comp128411_c0_seq1	(CGC)9	228	CGCCTCAGGAACTCAGAGAC	59.828	GACCCGAGTGCCTCTGC	59.767
comp130331_c0_seq1	(AAC)9	149	AGCTGGAGTGAAACTGGACG	59.966	GGACAACTTGGCCTGACATT	58.379
comp135433_c0_seq1	(TCC)9	133	AACCCATAGTAAGCCAGGCC	59.449	ATCTTGACTGCACTGCTTCC	58.181
comp136680_c0_seq1	(TCA)7	219	CCTCCTCCTTCTTCCTCTTCC	58.885	AGAGAGGTGCCTGGAAACAC	59.602
comp138590_c0_seq1	(CTC)8	130	ACCACCACCACCGGCAG	62.018	CCGAGGTGAAGGGATTTGGA	59.382
comp140876_c0_seq1	(GGA)7	207	GAATGTTCCAGAGGGCAGCT	60.035	TTTCCTGCTCTGGGTTTGCA	60.106
comp141756_c0_seq1	(CTC)9	149	GTGCCTGTAGAACAGCCTCC	60.392	TGCTTCTCCGCCAAACTCAT	59.963
comp142970_c0_seq1	(GAG)9	248	GGAAGAGGAGGAGGGCG	58.336	AGAACAGGCTCCAACACCAG	59.891
comp146168_c0_seq1	(ACC)10	161	TGCAAGCCCTATTAGCGCAT	60.179	AACATGACTTACTCTCATAGCCA	57.06
comp146530_c0_seq1	(TCC)7	103	CATCGCAGAACCTGACCCTT	60.036	CTCCGGGAGCTGCTTTATGT	59.821
comp146758_c0_seq1	(TTG)8	201	CCCAACACTTGTTTAGTAGCTGC	60.058	ACCTGACCAAGCACTGAAATCA	60.159
comp148593_c0_seq1	(TTA)8	184	TGAGTCACAAGCTTCCGTACT	59.039	AATCTGTGCTGCTAGCTGGG	60.107
comp154720_c0_seq1	(GCC)7	125	GAACCGCAAGAGCCTGCA	60.67	GTCTCGTAGCGGGCACAG	60.203
comp154778_c0_seq1	(TTA)7	100	AAACTAGAATGCACTGCACATATT	57.236	TTTCTCCACTTAACCACTTTCTAGT	57.867
comp155348_c0_seq1	(GGC)8	100	CCGTGCGGTGTGTGTGTAT	60.667	CGTCCTCCTCCTCAGCCTAG	60.822
comp155408_c0_seq1	(TCC)10	209	AGTGGCCATTGTATGACCCG	60.107	TATCCTAGCAGCCTCCTGGG	60.179
comp155838_c0_seq1	(TGG)8	138	CTGAGCCCTCACGGAACTAC	59.826	AGGGAGGGTGTGGATAAGACA	59.92
comp157463_c0_seq1	(CCA)8	152	CCAGAGTCACACAGCCAGAG	60.038	ATTGACACCAAGGGCAGGAG	59.961
comp161493_c0_seq1	(AAT)9	147	AGACTTTGCCAGCTGTCCTT	59.524	TGATTTAGGCCTTATTAATTTCTGTGT	57.526
comp174217_c0_seq1	(CGC)7	113	CTCGACGCGAACCAGGAG	60.202	CTGAGGCCACTTCCTGGG	59.326
comp175906_c0_seq1	(GGA)9	113	CAGTTTGCACCGTGTGGC	59.974	CTTTGGCCCACGGGAGG	60.009
comp183076_c0_seq1	(ATA)7	111	AGCAGATCACCCTCCTCACT	59.958	ACCAATGTCCTGATGATTGGT	57.255
comp183796_c0_seq1	(AGG)7	195	AGAATTCCAGTCCACGGCG	60.079	GGGAGCATGATCGTGGACAA	60.108
comp206890_c0_seq1	(GCC)9	104	GAGGACGCCTGTGGAGATC	59.56	CAGACGGATGGGTCCCAATC	60.179
comp28085_c0_seq1	(AGAC)10	177	CCAGAGAAAGTCCTGGCTGG	60.036	GCAAGGCTAAAGGGAATGCG	59.899
comp28113_c0_seq1	(TTGC)11	202	TCTTTGGGAGTCTCTTCGCC	59.391	TCCAGCCTGGTCACTCTTGA	60.472
comp28149_c0_seq1	(GTCT)11	212	TGGCAACCCTAAGCTGTGAG	59.963	CACCCAGCTGCCAACTATCA	60.035
comp28734_c1_seq1	(CTCC)12	160	AACCCTCTCTTCCCTCCTCC	59.957	AATACTGTGTCAGAGGCCGC	60.108
comp34117_c0_seq1	(TCAT)10	213	CACCACCAACATCCAACCCT	60.179	TCCTTTGAGCTGAACAGGTTCA	59.827
comp90789_c1_seq1	(CAGA)10	241	CCGAGTCAGCTTCCGTGATG	60.804	CTATCCTGTCCACTTGGCCC	59.819
comp96529_c0_seq1	(GTGA)10	160	GTGTGTGTGTGTGTGTGTGT	59.128	AGCACAATGATTTAGAAACCGAA	57.042
comp99025_c1_seq1	(GAGG)11	104	AGAGAGAGAGAAGGAGAGAGGG	59.22	GAGAGTGCTGACCGCTGAC	60.445
comp100376_c0_seq1	(ATGA)10	101	AGAACGGCTGGATGAATGGA	59.088	AGCCTGAGACGTCTGAGAGT	59.962
comp102097_c0_seq1	(TATG)10	141	ATGTGCCAAGTTGTGTGTGT	58.527	ATGCAGTCTTTCTCCTGGGC	60.035
comp102263_c0_seq1	(TTGT)11	250	AGGAAGAGGCACTTTCAAGACT	59.292	AGAATGTAGCCCTGGGAGGT	59.955
comp102721_c0_seq1	(TTTC)11	250	GCCAGTTCTCTCATCCAAGAC	58.373	TGCATGGCATATGATTGAGTAGT	58.023
comp102808_c0_seq1	(GCCT)13	247	GCATCCCTGGTTCCTCTTCC	60.107	AGAGAGATGAGGCAGGGAGG	60.106
comp103610_c0_seq1	(TATT)10	197	GACAGCACGTGGAAGGCTAT	60.108	TTTGGAGGCCGAGCACCTTT	62.352
comp104008_c0_seq1	(CATC)11	186	GGGCTTGTGACCACTGTAAGA	59.928	AGGCGTTCCATCTGTGTTGT	59.891
comp104560_c0_seq1	(GAAG)11	177	TCACTTGTGAGAGAGAACTCCC	59.106	AGAACCTTGCATGGAGCCTG	60.323
comp117439_c0_seq1	(TCCC)11	174	ACATTCCACGGGTTTGGACA	59.816	GGCAAGCCAGGGAGATGTAA	59.744
comp124537_c0_seq1	(TAAA)10	142	TCTTAGCTGGAACTTTGAGGCT	59.36	TGTGTGTGTGTGTGTTTGTGA	58.778
comp135004_c0_seq1	(GAAC)10	188	GGGTTGTGAGTCCAACCTCC	60.251	AGTGCAGGTGAGGGAAATCC	59.67
comp139287_c0_seq1	(ACGG)11	144	TCTGAAGCCTGACGTAAGCA	59.034	CTTCCCTGCCTTTCCTACCC	59.744
comp145218_c0_seq1	(GCCT)10	192	CACTCTCTTCTCCCACGCTG	60.109	GGGCCTCCCTTCCTGAAATT	59.664
comp150611_c0_seq1	(AACC)10	230	TTGGCCTTCCTAACTGCCAG	59.962	GGTGTGAGGGCTTGGAAAGA	59.89
comp158688_c0_seq1	(TAGG)10	132	AGTGCTTCTGAAATCCAAACCC	59.107	ACCTCAGGATCACGACCTGA	59.96
comp173263_c0_seq1	(GTCC)10	110	AAATGGGAGCAGGAGTCCG	59.396	TTTGAGCAAGACCCGGTGC	60.897
comp181062_c0_seq1	(CTGG)11	155	CGAGATGCCAGTTGGAAGGT	60.036	CCCATAAACCAGGAAGACTCC	57.717

## Sheet: RedFox
Sequence identifier	Microsatellite_motif	Product range	Forward primer	Forward Tm	Reverse primer	Reverse Tm
comp55296_c1_seq1	(AG)10	246	AGCAGTGGTTTCCTGGAAGG	59.889	CTCCTGGCATCTACCCTCCT	60.105
comp58388_c0_seq1	(TG)10	203	TTTGAATGCGTAAGTCGGCG	59.559	AGCAAGTCTTAGCACATCCTCA	59.431
comp58879_c1_seq1	(AG)10	222	GGGCCTTGGAGAAACATGGA	59.96	CTGCCTGTGTCTCTGCCTC	60.079
comp59458_c0_seq1	(AC)10	168	TCTCTCCCTCACACACCACA	60.106	ATAAGTGAGGGCGTGTGTGG	60.036
comp63163_c0_seq1	(CA)10	176	GCCGTGTCCGTGAAACTAGA	60.039	GTGGAGTTCCTGGAGTGCAG	60.321
comp64567_c2_seq1	(GT)10	234	CAGATATAGATACATAGACACAGGACA	57.545	GCCTCGCGCTGGGTACA	62.216
comp67027_c0_seq1	(AC)10	242	AGTTTCCTCGCCACTGCC	59.967	TTTCCTGGCAGGTGCTATGG	60.034
comp67683_c0_seq1	(GT)10	248	GCATGGCATTGTTTCAGAAGC	59.002	GACTGGCCAGATGCAACAGT	60.607
comp8546_c0_seq1	(AGC)10	185	TCATGTTTCAGCAGGGCCAA	60.179	GGTGAGGAAAGTGGGATGCA	59.962
comp11214_c0_seq1	(AAG)8	168	GGACACACAATGCCAGCAAA	59.611	AGTGCTGACTGGAATGCAGA	59.311
comp13964_c0_seq1	(GCA)10	149	ACCAAACAAGCCCTGTCCAA	60.033	TGGGCTTGCCTGAGAAGC	59.965
comp15087_c0_seq1	(TGC)7	238	GCGATTCCTTGGGTCCTAGG	59.893	GGCCTGTTGGATGACCTGAA	59.962
comp15087_c0_seq1	(TGC)7	227	GGCAAGCTCACCTCAGGATT	60.035	CAAGCACAGACACTAGCCCA	59.965
comp15252_c0_seq1	(TAG)10	212	GACAACGCAGTGTTTGGACC	59.971	TCCATTTACAATGCAGCGTGAC	59.839
comp15754_c0_seq1	(TGT)7	176	GTCCAGCCTATGTGCAGTGT	60.036	TCGATTGCTTAAGGCCAAAGT	58.21
comp16134_c0_seq1	(TTC)9	249	CCTGTCGTGACCAAATGGGA	59.964	CACCCACACCTGAGGAAGAC	59.965
comp16148_c0_seq1	(CCG)8	105	TTCATTCCTCCTTCCACCGC	60.035	ACTCCAATAGATGATGAACCTCCT	58.777
comp16193_c0_seq1	(CGC)9	218	CTCTGCGATCTGCTCCTCAG	59.969	AGACGCTGCTCAGTTACTCG	59.831
comp16230_c0_seq1	(CAG)9	188	TCCCTCCGAGATGTGTCCTT	59.959	CCAGGAGTTTGGAGCAGGTC	60.322
comp16267_c0_seq1	(GCC)12	113	GGGAAGGTGAGACGCTGTC	60.08	AGACGTCCCTGGCAGATTTG	60.036
comp16372_c0_seq1	(AGC)8	147	GTTAGCCATGATGCAAGCCG	59.97	GCCTCGACAGTCCTCGC	59.855
comp16433_c0_seq1	(AGG)7	193	TTATCTCAGGAGCCCAGCCT	60.031	ATGCCTGAGGATGTCTCCCT	60.03
comp16443_c0_seq1	(AGA)9	142	GGACCTCTTTGGGTTGGGAC	60.251	GCCCTTCTTCTTCACAGCCT	59.963
comp16652_c0_seq1	(GCA)8	237	ACAGCTGCACCACATATGCT	60.035	CATGTCGGCAGCCTGGATC	60.891
comp16715_c0_seq1	(AGC)7	230	AGAACTCCGAGTCAAAGCCG	60.038	CTGCATCCTCGGTGCCTG	60.513
comp16720_c0_seq1	(TCC)12	172	GGAAACGTCAGCTGGCTGTA	60.32	CAACGAGCTGGACATGTTGC	60.11
comp16805_c0_seq1	(ACC)7	115	GGACCCGACCCTTTCAGC	60.046	CCCGAGAGCTATTCCTGCTG	59.967
comp16808_c0_seq1	(GCC)8	206	TGGCGTCGTTTCCTTCCC	59.969	CAAGTCCTCCGAGTCACACC	60.038
comp16817_c0_seq1	(GAA)10	165	CCTGCTTGTGCACTCTGTCA	60.534	AGGATGAGCAGGAGCCAAAC	60.035
comp16957_c1_seq1	(GAT)8	186	GAGATCAGACACGGATGCGT	59.899	GACGGAGGAGCTATCACACG	59.97
comp17537_c0_seq1	(GGT)9	171	CCAAGGCACTGCAGAGTAGT	59.677	CAGTCCGACGATCCCAAGAT	59.253
comp18261_c0_seq1	(TTA)7	217	TGCCACTAATGAAATATTGGGTGT	58.732	GCAGAACACAGAGAAGGCCA	60.25
comp18277_c0_seq1	(GGC)8	249	TGCTGCCCAGATTTAACCCA	59.592	TCGCCTCCTCCTATCCTGTC	60.179
comp18734_c0_seq1	(GAG)7	248	AGGGCAGATCACCACCTAGA	59.66	TAAATCGCATTCCCTCCCGC	60.534
comp18951_c0_seq1	(AGA)7	141	AGAAACAGAAGAAGAAGAAGGAACA	58.346	CTGGCTCTGAGAACAGCCAA	59.964
comp19172_c0_seq1	(GGT)7	127	GCAATTACTTTGAGGACAGCGG	60.16	CACATGGATATGAAGATTAAGCCACA	59.512
comp19222_c0_seq1	(GAT)10	188	ACGACATTGTGGACTTGGCT	59.891	CCACTTCATCAGGGTGCTCA	59.674
comp19762_c1_seq1	(TGC)8	182	CCAAGAGGCTAAGGCAGTGT	59.674	CTGCTCAAGGACCAAGAGCA	59.964
comp19936_c0_seq1	(CAG)8	156	AACAAGAGGCTGCAGGGAAA	59.814	CGCAATCTTCACTCCCACCT	60.036
comp20188_c0_seq1	(AGC)9	100	GGCCGGTCTACCTCAAGAAG	59.824	TTACTGTTCCGCGTCTTGCT	59.967
comp22265_c0_seq1	(CAG)7	173	GAGAGACCATGAGATCCGCG	60.04	CCTCTTCCTCCTCCTCCTCC	60.106
comp24058_c0_seq1	(CGG)11	147	GATGGTCAGATAGCTCCGGC	60.038	TGCTGCAGCTCTGGAAGAAA	59.891
comp25225_c0_seq1	(TGC)10	217	GTGGAAGGACTGTCCAGCTC	60.037	AGTGAAAGTGTCCCAGCTGG	59.891
comp25892_c0_seq1	(AAT)8	246	TGTGGCATGCTAGTACACCC	59.748	TGACCTGCTTCCTTCCTGTT	58.86
comp26169_c0_seq1	(TTG)8	248	TGTCAGTCTTTGCTGCTTCGA	60.203	AAGCTGAAGCCAGTCGTACC	60.037
comp27041_c0_seq1	(TGG)7	101	CTGGCCAGAGCTGAGCTTT	60.002	GTGGTTCTGAGTCATCCCGG	60.108
comp27319_c0_seq1	(CAA)10	180	TTCCAGGTCCAGGTCTCCAA	60.105	CCTTCCTGTCTGTCTGCCTG	60.037
comp30667_c0_seq1	(GAG)8	149	GGAGGAAGAGGAGGAAGAGGA	59.71	GTCTGCTGTGTGACCAGGAA	59.893
comp31883_c0_seq1	(CCA)8	202	AAGTTTGAGATGCGGGAGGG	60.035	GTCCTGAAATAGCCTGCCGT	60.108
comp33728_c0_seq1	(GCC)7	148	CGACTTGCGCTCAGGCA	60.418	CCCTCTCCTCAGTCCAGGAA	59.958
comp34794_c1_seq1	(ATG)9	155	TGCTTATGTCCCACCAGATGT	59.085	ACCAGCTGTGCCAAAGAGTT	60.107
comp35111_c1_seq1	(GCT)7	146	GGACTTCCAGGAGTGCTGTC	60.037	GAGGAAGTGTGTGGCTGGTT	60.179
comp35266_c1_seq1	(AGA)8	221	CAAATGGCAGCCTGATTCCG	59.898	TCATCTTCGCCTGGCTTACC	59.822
comp37909_c0_seq1	(TGG)7	173	ATCACTTGCAAGAGGCTCCC	60.035	GCTGTGCCACAGGGACC	60.341
comp38268_c0_seq1	(TGA)8	125	GGGAGTCTGATTCGGGCAAA	60.035	CTTCAGGTGGCACTTTCCCT	59.889
comp39692_c0_seq1	(GTG)8	221	TCTGAGGCTAAGCTGACTGC	59.466	TGGTGATTGGTCGGTCACAG	59.965
comp39779_c0_seq1	(CCG)9	100	CCCAGAGCTCGCTCGCC	62.678	GCTGGAGGAGGAAGAGAAAGG	59.791
comp39860_c0_seq1	(CCT)7	138	GCTCAGGCAGTGGAGGG	59.342	GCTCTTCCCACACTCCTCAC	60.037
comp41000_c1_seq1	(GGA)8	161	GAGGAGGAGGAGGAGGAGGA	60.997	ACAGAGCGGAACTTCTGACG	60.039
comp41385_c0_seq1	(AGG)7	217	ATACGAGCAGTACATCGGGC	59.686	GTCGTCCTCCTCTTCCTCCT	60.034
comp41533_c0_seq1	(AGG)8	192	CTCTGGCAGGTCAAGTCTGG	60.037	CTCCTCTTCTTCCTTGCGCT	59.751
comp41537_c0_seq1	(GAA)7	241	GGGAGTGATGCCTGGAAACA	59.962	GGGCCTCAGGGTTAAGAGAC	59.458
comp41802_c0_seq1	(GCT)9	170	GACCGCTTCACTGGGCAATA	60.392	CCGTGTGTGGTTACTGAGCT	59.966
comp41835_c0_seq1	(GCC)8	242	CAGCTTCCTGGAGCTGTTCA	59.964	CCTCATCCTCCGTCTTCTGC	59.896
comp42094_c0_seq1	(GCG)8	144	CTTCCTCCTCCAGCTCCTCT	60.032	CGTCTCCTCTCTTCCGCTTC	59.9
comp42094_c1_seq1	(AAG)7	193	CAACGAGAGGCAACAAACCC	59.689	TTCTGTCCTCTCTGCCCTGA	59.885
comp42234_c0_seq1	(GCC)9	224	GGTAAGCACCTTCAGCACCA	60.251	GGGTGGACATCGACGAGTTT	60.038
comp42249_c0_seq1	(CGC)9	145	CTCCTCTCCGATTGGCTGTC	59.896	TCCTCTAGCTCTCCACAGGG	59.74
comp42358_c0_seq1	(GGC)7	175	GCACTCGATGATCCAGTGCT	60.179	CCTGCAGATCCTGGGCAAG	60.453
comp42371_c1_seq1	(GCA)7	181	CTTCACTGAGAACCCTGGCC	60.322	GAGGGCTGGACTCCCATTTC	60.107
comp42607_c0_seq1	(CCA)7	248	CGATTCCGCCCGAACCC	60.581	GGATTCCGTCCACCTTCCTG	60.108
comp43202_c0_seq1	(GAG)8	212	GTCAGCTGAGAGCCGTGG	60.126	AGATACGCTGGGCCAGTAGA	60.106
comp44043_c1_seq1	(AGG)7	179	GTCCTGGCCTTTCGTCCTTC	60.674	TCCAGAGTCACACACGTTCG	59.97
comp44095_c0_seq1	(GGA)7	228	CTGTGTCCGAGAAGTTGCCT	59.966	AGAGCAGCTAAAGGCCTTGA	59.013
comp44216_c0_seq1	(CAT)7	190	TCATCAGCAGGTTGAGCAGG	60.036	AACATGGTCTGCGTGCCTTA	59.964
comp44274_c0_seq1	(CTG)8	208	CCACTGTGTCCTTCACCTCC	59.965	CTGAAGGAGGCCGAGGAATC	59.894
comp45152_c0_seq1	(CGG)11	187	CGAACACCAAGTCCGGGTT	60.228	CTTCTGAGCTCTTGCCCACA	59.964
comp46245_c0_seq1	(TCC)7	227	ATAGCTTGGACTCCCGCATC	59.605	GATATCCTCCAGGCCAGTGC	59.964
comp46899_c1_seq1	(GAA)7	206	ACAAACAGGCCCTGGAAGAG	59.889	CTTCTTGGACGGAGGACACC	60.037
comp47212_c1_seq1	(CGG)9	148	TGAGCCTCTGTCTTTCCTGC	59.677	AGGGATCATTTCGTCGGTGG	59.822
comp47288_c2_seq1	(CAG)8	132	GACAGTGGGTCAGCTTCGAG	60.389	GCCTGACTCTGCTGCAGTT	60.302
comp49163_c0_seq1	(CTT)8	174	CGTCACGATCCCTGATCACC	60.249	ATGCCAAGCAGACTGGAGAC	60.036
comp49316_c1_seq1	(TGC)7	205	CACGTCTGTCTCTTGGCCTT	59.966	TCTGTGGGAAATTGTAGTTATGCT	58.184
comp49435_c1_seq1	(AGG)8	127	GGTCGGGTGTTTGTGAGTGT	60.463	CTCTTCCGTCTCCTCAGTGC	59.828
comp49766_c0_seq1	(TCC)7	212	TCTGCAGGTGCTCTGTTCTG	59.966	TACCAGAGAGGGACAGAGGC	60.033
comp50116_c2_seq1	(GCG)8	172	TGCGGAAGGATCATTAACGAGA	59.571	CGCTCTCCTCTCGTCCCT	60.124
comp50260_c0_seq1	(CCT)7	178	CAGACGTTTCTCCTCTCGCC	60.457	GGACCAACAGCCCATCATGA	60.034
comp50264_c0_seq1	(AAG)9	235	CGGGAGGAGCTGCTCTATCA	60.825	TGCACATAGTTTGTTGCCCTG	59.387
comp50383_c1_seq1	(CTC)9	245	GCCTCTCGGAGTCAGAGTCT	60.394	TGACAGGGCTCTCCTCAGAG	60.324
comp51307_c0_seq1	(GGC)8	205	TGGGAAGATCATTCTGCACCT	59.082	TTCGTCGGAAGTGACTGTGG	59.968
comp51641_c0_seq1	(CCG)7	148	GATCCAGTCGTTCCAGCCAA	60.036	ACCTTTCCTCATGCTGCAGG	60.323
comp52261_c1_seq1	(CTG)10	162	ATTCCTCTGTTGGCTGCAGG	60.323	AGTGGGAAATGGAGCGAAGG	60.035
comp52697_c2_seq1	(TTA)8	188	TTGCTTTGTTTGGGTGTCTTT	57.029	AAGGCTCAACTTCAAGCAGT	57.645
comp52701_c0_seq1	(TGC)11	240	CTGCTACACCATGAAGGCCA	60.035	GCAGCTACAGAGAAGGCCAA	60.036
comp54385_c0_seq1	(CCT)10	117	AGAAGCAAGGGCAGCAAGAT	59.961	GCCACTGAGGAGAATGTAGCA	59.792
comp54718_c0_seq1	(CCG)9	108	GTGACGGTATCCAGCTCTCG	59.97	GGAGATGAAAGAGGAGGCGG	59.894
comp54806_c0_seq1	(GCT)7	146	TGCCCGGGAGCCATGAG	61.523	CCTAGAAGGAAACTGGGCCG	60.108
comp55339_c1_seq1	(AAC)8	189	TGCCACTCAAGGAACAGGTT	59.449	TTCCTTCTGTGCTGAGCTGG	59.964
comp55339_c1_seq1	(CAA)10	189	TGCCACTCAAGGAACAGGTT	59.449	TTCCTTCTGTGCTGAGCTGG	59.964
comp55766_c0_seq1	(GCG)9	242	CTGAGGGAAGCGGAGTGAAG	60.108	AGCCTCTTTCCAGGTTGCTT	59.52
comp55817_c1_seq1	(AAG)8	240	TGCAGGGCCTTTCCTCTAAA	58.928	GGGACTTCGAAGATGCTGGG	60.463
comp55818_c0_seq1	(CCA)8	182	GGCCTCCATCTCACAGACAC	60.108	CATCGTCTCTGCTGGGACTG	60.179
comp56128_c1_seq1	(AGA)8	100	CCCAGGAGGCTTGCTATGAG	59.892	GGACTCACAGACAGTCGACG	60.11
comp56315_c2_seq1	(CTG)8	188	TCTTCTACAGTCTGGCAGAAGAC	59.492	TATCCAGGTTTCGGAGCAGC	59.822
comp56377_c0_seq1	(CCG)8	221	GTGTTTCTTTGTGGTGGCCC	59.896	TTTCATCTGGACGCAAACCG	59.128
comp56928_c0_seq1	(TCC)8	235	GGCACATCCTGTTTGCACTC	59.758	CAGCAGACCAGAACCTCAGG	60.037
comp57010_c0_seq1	(TTG)8	169	CCAATTCCCTGTCCTGCCTT	59.96	GGAGTGACCAGGAGCAGATG	59.822
comp57134_c0_seq1	(GCG)10	146	ATGTGGATGACAGCACCCAG	60.035	CACCACATCCTCATCGCTGT	60.108
comp57746_c0_seq1	(TGC)10	226	AAGGCATGCTTGGACTACCC	60.034	GCGCCATCTTCTCCTCACTT	60.108
comp57746_c0_seq1	(GTG)9	124	TGTGTGCTCGCATCTCCTTT	59.965	TCAACCACTGAGCCACCAAG	60.179
comp57802_c1_seq1	(TGC)9	238	TCTCAAAGAGCTGCATCTGGG	60.066	AAAGTGCAGCTGGACGTAGG	60.321
comp57885_c1_seq1	(CTC)8	167	CCGCCCGGTGATATTGACAA	60.463	GGAAGGGAGGGAGGAAGACC	60.984
comp58854_c0_seq1	(TGG)8	210	GCCGAATAGGAGTTCCGTCC	60.249	GCACCTCTCTGCTCAGAACT	59.392
comp59074_c1_seq1	(CCT)11	205	CTCGGATTTCAGCTCGGAGA	59.259	ACGGGCAGGATAAGGACTCT	60.032
comp59449_c0_seq1	(GCC)7	241	GCCCAGGCGAGAACAGTATG	60.812	CTGTTCCATGTGGCTCCGG	60.747
comp59479_c1_seq1	(TCC)8	234	CACCTTCCAGAACACCGTCA	59.894	CGGCTGGAAGTCATCATCGA	59.897
comp59568_c0_seq1	(GCG)8	193	CCAAGATGGCGCCGGAA	60.093	AACTGATCGACTTCCAGCCC	59.749
comp59950_c0_seq1	(CGC)11	224	GAGAGCACAGACGCCGG	60.176	GCTCAGTCTGGAAGGGAGC	59.78
comp59953_c0_seq1	(CCA)10	168	GACGAGAGGGATTCTGAGCG	59.97	TCTGTGACCTGGAACACAGC	59.893
comp60496_c1_seq1	(AAG)8	232	CCAGAAGCTTCTCCCTGCTC	60.108	CAGGCTGAGGTGAGACACAG	60.038
comp61289_c0_seq1	(CTG)7	170	GAGGGATGATGCTGCGTCTC	60.6	CATTTCAGTGCTGCATCGCA	59.831
comp61521_c3_seq1	(GCC)7	100	GGGAAGGGACAGTCGGTC	59.02	CATTCTGGAGAGTCACCCGG	59.823
comp61917_c6_seq1	(GCT)8	121	AGAGGCTTTCTGCTGTTGCT	59.89	AATGCACTCTCTGTACGGGC	60.108
comp62273_c2_seq1	(GCC)7	142	GATAACACCTGGCCCAGAGC	60.465	TGAGCACCATCGAGAACCTG	59.753
comp62776_c0_seq1	(CGC)8	159	TAGTTCTCCTCCTCAGCCGC	61.038	AGGTGAAGTCCAGCAAGTCG	59.966
comp62906_c3_seq1	(AAG)10	238	AACACAGCTGACACCAGTCC	60.179	AGGGAGCTGGCTTTGTTCTC	59.963
comp63277_c7_seq1	(GGA)8	243	ATGTCACTGTTAGGCGTGGG	60.036	CTTCTCTCTGGAGCCTGCAC	60.108
comp63292_c0_seq1	(TCC)8	155	GCTGACTGCTCCTCTTCCTC	59.824	TGTGAAGGTCATGTGCTCCC	59.963
comp63760_c5_seq1	(TCC)8	225	CGTTGGTCAGTGCATTGGTG	60.04	TGCTCCCACCTAGAATCCTCA	59.992
comp63800_c0_seq1	(GCT)7	239	TTGATGTGTCCATCCTGCCC	60.034	CTGGCTGGACAGGATCATGG	60.179
comp64048_c1_seq1	(CAC)8	241	AGATGATGGCCCTGATGCAG	59.889	TGGTGATGGTGGTGATGGTG	59.962
comp64048_c1_seq1	(GAT)7	159	CCACCTCTGGTACTGCCTTG	60.036	AGTCTGAGTTGGCTGGCATC	60.036
comp64163_c2_seq1	(TTA)11	193	TCGTGAGTGACAGAATTTAGCT	57.479	CCCTTCTCTGCAGGCAAGAG	60.393
comp64193_c3_seq1	(GTT)8	193	CCGCGTACGTGTATCCGTT	60.226	CCTTTCTCCAGCTACCGCAA	60.036
comp64213_c6_seq1	(CCA)7	122	AGGCCGACATCTGTCTCTCT	60.034	AGTGAGAGAACAGCGAAGGC	60.038
comp64351_c7_seq1	(CCG)8	236	TGCAGCTGGTACTGTAGCAC	60.037	TACCAGCCCTACGAGATCCC	60.179
comp64425_c1_seq1	(CAA)7	250	ACAAGACACCACGAGGCATT	59.891	TGATCTACGCCCTCCACTGA	60.034
comp64474_c0_seq1	(CAC)8	102	AGCCAGCGCTGACCTTC	59.681	GCGGATTGGCTCCTGGATAT	59.674
comp64576_c1_seq1	(CCG)8	181	TGGCGATCGATGGCATTGTA	59.894	GCGAGTACCGGAGCCACTT	62.003
comp64772_c0_seq1	(GGC)10	215	TCTCATCCTGAATTGCCGGG	59.819	CAGCCATGAACCGGTTTGG	59.414
comp64983_c7_seq1	(GCA)8	117	CTGAAGTCGCCCAGCTCTC	60.154	CTGACTGGCCACGTACTTGG	60.671
comp65059_c1_seq1	(GCC)7	174	CCTCTTGCTGAAGGTCGTGT	59.966	GAGATGGAGCTCGTCGGTG	59.935
comp65097_c0_seq1	(GGC)7	228	GTCCTGGTGGTAGTTCTGGC	60.036	GCGGTTTCCTGCTTCAACAG	60.04
comp65100_c0_seq1	(TGA)13	164	TGCAGGATGCTCGGAAACAT	60.035	TGGAAAGCACAACTGAGGCT	59.817
comp65141_c1_seq1	(CTG)9	229	GGACTTTCCTCCGCTTTCCA	59.964	ACCATGTCTGTGAGCTCTGC	60.037
comp65216_c0_seq1	(AGC)7	206	GCCGAAGAGCTCCTGTTTCT	60.037	AAACCAGCACCTCGAGTCAG	59.966
comp65238_c0_seq1	(CCG)12	189	GACCTCCTCGCTCTCATTGG	59.896	AGCAACTTCCACTCGCTCC	60.004
comp65243_c0_seq1	(CCA)9	184	TGCTCTTGTTAGTCCCAGCG	60.037	CTCAATGAACTGAAGCGCCG	59.904
comp65257_c0_seq1	(ATC)9	232	CAGAACTAGGTCCTTTCGGTGT	59.701	GACGACGATGATGACGACGA	59.974
comp65263_c0_seq1	(CAG)8	164	TTTGGAGGCAGAAGCTCTGG	59.963	CTGGCTCTCCTCTCCTGCTA	60.106
comp65292_c0_seq1	(GCC)7	191	GCTTGTGGGCCACATCATTC	59.826	TGGCTTTCTGGTTGCATCCT	59.887
comp65352_c0_seq1	(GGA)9	219	TTTGTCCTGCTTGGTCTCGG	60.25	TGTGTCGCCGATGATGATGT	59.824
comp65370_c0_seq1	(TCG)8	217	GGGTCTCCCGGCCTAGTAAT	60.471	GAACCGATTCTGCAACGACG	59.907
comp65382_c0_seq1	(CTC)7	108	TTTGCTGAGGAGCCCAGAG	59.318	AGCGAAACTGGCTGAGATGT	59.677
comp65401_c0_seq1	(GCG)8	189	TGGTTGGGTCGTAGGAGTCA	60.179	GCCGATCGCAGCACAGG	61.295
comp65417_c0_seq1	(CAT)8	213	TGGAGCAATCACTGGAGGTG	59.674	CCACAGGCTGTTCTGGATGT	59.963
comp65418_c0_seq1	(GCC)9	173	AACCACAACTCCCAGAGTGC	60.179	AGGGACTGAAGATGGGCAGA	60.253
comp65470_c0_seq1	(CTT)7	221	TTTCTTCCGTCTGGGCATCC	60.035	TGCAAGAGTCTAGTGCGGTG	60.038
comp65524_c0_seq1	(GAA)7	223	CAGTACCAGCCCAAGCATCA	60.035	TGGGAGATCTCGAGCTGGAA	60.033
comp65539_c0_seq1	(GCC)7	167	GGAAGCGGAAGGGAGTTCG	60.448	ACACCACGCAGTAGGGAAAG	59.965
comp65566_c0_seq1	(CAA)11	176	AAACAACAACATCAACATCAACATC	57.532	AGTTGATGCAATCGGCTCGA	60.108
comp65574_c0_seq1	(CCG)10	161	CTTAGGCCGCTTCGCTGG	60.892	TTTAGCCTGCTTCAGCCTCC	60.035
comp65590_c0_seq1	(GCG)8	136	GATCGTCCTTGTCAGCCGG	60.519	GAGGAAGACCCGGTACTCGA	60.394
comp65676_c0_seq1	(TCA)7	250	CCTCATCACCACCTGTTCCC	60.035	CGTTCTGCCCTAGGTCCAAA	59.676
comp65685_c0_seq1	(TGC)8	181	TCTGGCAAGCTTCTTCCTGC	60.607	TTGACACTTGGATCACGGCA	59.892
comp65693_c0_seq1	(AGG)7	107	ATCCGGTCTGAATGTGCCAG	60.108	CAGAAGTGCCGGGACTCTTC	60.39
comp65702_c0_seq1	(TCA)11	234	AGGCAGGAGCATCCCAATTT	59.663	GAACAGTAGGCGAGCTCGAG	60.248
comp65712_c0_seq1	(CCA)8	189	TCACCTGTCTTGGCCACATC	59.963	GAGCAGCACCTTAGCGAAGA	60.109
comp65739_c0_seq1	(TCC)9	220	TGGGCATCTTGAGCAGACTG	60.036	CCGCTCTGCTTGGCCTT	60.01
comp65814_c0_seq1	(TCA)7	158	AGGCCATCTGAAGGAACGAA	59.016	GCAGCTGCTGAAAGACCTAAG	59.263
comp65932_c0_seq1	(GCT)7	240	GATCCTGATGTGCTGGTGCT	60.107	TCTTCTCACAAGACAAGACACA	57.264
comp66173_c0_seq1	(GGT)7	156	ACTTCATCTCACCCTGCAGC	60.036	AGAAGGGTCAGGCCACATTG	59.961
comp66203_c0_seq1	(GGC)8	167	CTGTTGACCAGCAGGCACT	60.228	AGCATGTCCCAGATGAACCG	60.108
comp66224_c0_seq1	(CCT)8	219	GAATGGGAAAGGGTGGAGGG	60.033	ACGAATCGTGCTACTGGCTG	60.459
comp66320_c0_seq1	(GCC)7	208	CTCCCTCCTGCTCGCCC	61.588	TGTCTTGTTGTGTGCTTCGC	59.623
comp66589_c0_seq1	(GTG)8	212	GTGCCACTCCCAACCGATAA	60.036	TAGTGCAAACGAGGGCTAGG	59.465
comp66612_c0_seq1	(AGG)7	232	ATCGAGTCGTCGCTGTTCTC	59.903	ACCTCCCAGGGAATTGGTCT	60.179
comp66795_c0_seq1	(TTC)9	130	ACAAGTCTTGCCCTGAACCC	60.179	TGGTTTCCTCTCATTTCTCTATGA	57.126
comp66914_c0_seq1	(TTG)8	197	GGTGGTAGGTCCCTGAGGAT	60.031	AGCACGCACATTCTACAGCT	60.037
comp67045_c0_seq1	(GCA)8	208	CGGAGCCGGAGAAGCAG	59.851	ACTCTGTTTCGATTTGGACCCT	59.628
comp67076_c0_seq1	(AGC)7	121	GAAGAGCGCCTCGGCCA	62.222	CTTGGGCGGCTCCTTGTAG	60.45
comp67232_c0_seq1	(TCA)7	200	CATGAAGCCTCTCCGGTCAG	60.179	TGATGAGGTCGGAGCGTTTC	60.109
comp67241_c0_seq1	(GGC)7	249	CAAGGGCGACTCCAAGTACA	59.68	GAGTAGGTGGAGTCCCGCTT	60.971
comp67266_c0_seq1	(TCC)8	181	CAACAGGCCCTCCATCCAC	60.379	TTCATCGGAGCCACTGGAAC	60.036
comp67361_c0_seq1	(CGG)8	185	GAGTTGGGACTGGGCTCCTC	61.905	TCGGAGAAACCAGGAAGGGA	60.179
comp67388_c0_seq1	(ATT)8	225	CCACAGCCTGCCCTAATGAA	60.034	CTCTTACGCCCAGCAGTGAA	60.037
comp67498_c0_seq1	(GCC)7	183	ATGAGGCACTGGGTCAACTG	59.963	GGGCAAAGAACGCTCGGAAA	61.512
comp67578_c0_seq1	(AAG)8	178	ATGAGCGCTCTTGCCAAGA	59.702	ACCAAAGGGAGTTACTGTTGT	57.054
comp67712_c0_seq1	(GCT)7	200	GAGCTTCTCCACCAGGCTG	60.079	AGTGCGTCTTCTACAGCGAC	60.11
comp67935_c0_seq1	(TAA)10	244	AGTCACAATCAACTAAGGGAAGTGA	59.928	CAGTGCTCAGGGCCTCATTA	59.457
comp67994_c0_seq1	(GCT)8	213	TTGTAGGTGGAGCTGGTTGC	60.251	TTTGTTCCAGGCACCCTCTC	59.89
comp68040_c0_seq1	(TGA)8	178	CCTGACTTTCCGCTGATTTCC	59.26	AAAGTCAATCAGGAGGCCGG	60.035
comp68155_c0_seq1	(AAC)8	220	TGAGATGATGTGCCTGGCAT	59.451	TCCAGAGCCCTTGTCCTGTT	60.768
comp68165_c0_seq1	(TTG)10	192	AGGAACTCAGAACCCAGGGT	60.104	ACCTGACTCTGCCACCTACA	60.179
comp68470_c0_seq1	(AGC)7	230	TTCTCGTGGGTGTTTGCTGT	60.107	CAGGAAGGCTAGAGTGGCAG	59.822
comp68486_c0_seq1	(TTC)7	139	GCTGCTCACACTAAGGCCTT	60.322	TGAAGAGTCACAGGAAGAGGG	58.748
comp69015_c0_seq1	(AGC)8	229	ACCCACCACTGGATCTCCTT	60.179	AGGCCTCACACAGCAAGAAG	60.251
comp69161_c0_seq1	(TTA)8	147	CAAGGTCGTGTGTGTGCTTG	59.972	GGGTGGCTTAGTGGGTTGAG	60.323
comp69248_c0_seq1	(GGC)7	229	GCAGACCTCACAGGAGACAC	60.038	CACGCTGTAGCCAGAGAAGG	60.459
comp69294_c0_seq1	(ATG)8	242	CCTGGACGTTTGTTCCCAGT	60.179	AGAATCCCAGTGGCAAGTGG	59.961
comp69606_c0_seq1	(GCC)8	232	TGCACTTCTCGCCAGTCATT	59.965	TCGGTATCCTTGCACTCAGC	59.824
comp69853_c0_seq1	(TGA)8	147	CAGGCAGTAGGGAGTCCAAG	59.461	ACTACGATTTCTCCGAGCCT	58.235
comp69963_c0_seq1	(TTG)8	237	TAACCACAGGATCAGCACGC	60.391	TGCCAGTGGTATCATTTGATGT	58.033
comp70012_c0_seq1	(ACA)8	177	TGGGATTCCACAGGCTAGGT	60.253	AGTAAATGGACGGTGCTGGG	60.035
comp70120_c0_seq1	(GAG)9	173	GGAGGGAGCCCAGAGAGTT	60.307	GCACTCAGCGGCTCTCC	60.176
comp70278_c0_seq1	(TGA)7	197	CGGCCAAAGCAACGTTCTAG	59.834	GGTGGGCTGACTTCTTCCTC	60.036
comp70395_c0_seq1	(CGC)8	168	GAGGCCTTCACAGACCTGTC	60.037	TTTCCTTTGCCTCCGAGGAC	59.964
comp70484_c0_seq1	(AAT)9	219	ACAATACCACAGAAACAGCACT	58.179	TGTGCAATCTGAAAGCCTGT	58.015
comp70649_c0_seq1	(GTG)8	220	CTAATCCGGTTGGGCGTCC	60.523	GCCTCATGCTGCTCAAATGG	59.898
comp70797_c0_seq1	(CAC)10	222	CGTGCCAAAGTCTCCCTTCT	59.965	AGGAAGGGTGTTATGACGGA	58.053
comp70810_c0_seq1	(ATC)7	189	GGTGCAAGCCCTCTCTTCTT	59.963	CCCTGATGATCCATGCTTTCC	58.763
comp70916_c0_seq1	(GCT)9	160	GTGCAGAAAGGTGCTGCTTC	60.04	GCCTGCTTGAATTTCCTGGC	60.108
comp71692_c0_seq1	(GGC)7	225	CCCAGGTTGAAGAGCCGATT	60.035	CTGCGTCCTGCTCCTCG	59.854
comp71792_c0_seq1	(GCG)8	232	GGCATTCTTCGAATTCGCCC	59.971	GGAAGCCAACCAGGAAGTCA	59.89
comp72911_c0_seq1	(GAT)7	247	TCCCACCAACAACGTTTCCC	60.752	GCAAAGAACTTCTACAATTCAATAGCA	58.977
comp72978_c0_seq1	(CTC)8	231	CTGAGGAACTTCTCGCTGGG	60.108	GACCGTCGAAGAGCAGCTG	60.804
comp73053_c0_seq1	(AAT)7	136	CAGCCAGTGCCAGGAGTAAA	59.963	TTCCATAATTACAGAGAACCAGGA	57.116
comp73211_c0_seq1	(AAC)9	209	ACCTATATACACGGAGACCTTCT	57.678	GCCGTCACTCCAAAGAAGGA	59.965
comp73243_c0_seq1	(TTG)10	221	CAGTCTGTGTGCCAGTGTCT	59.894	TATGAGCATGTGGAGCACCA	59.089
comp73318_c0_seq1	(GCC)7	142	CGCAGTCTGGAAGCGCA	60.418	TGATGGACCGAGCTTTGGAC	60.036
comp73333_c0_seq1	(CCA)7	248	GAGGCTCAGAGATCGAAGGC	59.968	GCACATGCATGTCCTTTCCC	59.826
comp74127_c0_seq1	(TTG)8	184	GCAAGAACTAGACTCCAGTTCT	57.471	ATGATCAACGCCCTGTGGTT	59.962
comp74468_c0_seq1	(CCT)8	206	GAACTCATCCTGCAGGCGG	60.817	GTGGCTCCAGACCACACTTT	60.179
comp75034_c0_seq1	(GGT)9	209	TCTTCATGAGCTGGAAATACGGT	59.802	TTGCCTTTGGACACCTGGTC	60.467
comp75154_c0_seq1	(ATA)7	116	CATTGGGCACAATTCACGGT	59.397	AGGCAAACATGTGAGGACAGA	59.579
comp75202_c0_seq1	(AAT)7	120	GGGAGGAGGTGAGTTCAGGA	60.252	ACACTGATTCAGGTTTACACAGGA	59.897
comp75432_c0_seq1	(TGC)8	236	TCCTCCTCTGATCCACTATTGG	58.419	GGAAGCAGTAGCCAGTCAGG	60.108
comp75720_c0_seq1	(GGT)7	217	ACCGAGCAATCCGTTTCTGT	59.965	GAACCGGAACCGATGAACCA	60.321
comp76572_c0_seq1	(TGA)8	213	GCTGGGTATGATCCACGCTT	60.179	CACACCTTCAACCCTTGGAGA	59.857
comp77853_c0_seq1	(CGC)9	156	GGGCTTCCTCTTCTGCAGTT	59.963	TAGCAGAAAGTGAGGCTGGC	60.036
comp78337_c0_seq1	(TTG)8	222	CCCTGTCCATTCGTCACTCA	59.392	ACTTTGCTAGGAGTGCCATTCA	59.96
comp78703_c0_seq1	(CTC)8	182	AGAGGCAAAGAGGTCCAAGC	59.963	TCCCTGTCCCTTCCTCTCTG	59.958
comp79630_c0_seq1	(ATT)8	204	CAGACACAGGTAGAAGGCCG	60.109	AGCAGTCACAGGCCATATGG	59.818
comp79698_c0_seq1	(CTG)7	231	GAGGAGGCAGCAGAAGACTG	60.108	TGCTCAGTACCAACAGCAGG	59.965
comp79842_c0_seq1	(TGG)8	161	TGGTGGGCAAGAAGAAAGGG	60.179	AGCTAGGCAAGTTCCCACAC	59.963
comp79860_c0_seq1	(ACA)9	192	GGTGACACTGGAACCCTCTG	59.965	AGACTGAACTGTGCAGAGCC	59.965
comp79966_c0_seq1	(TGG)9	233	GCTACGTCCTTGTGGTAGGG	59.825	GAGAGCCGCGTCTGTGTATA	59.338
comp80296_c0_seq1	(GCT)8	124	GTTCTCTCACAGCTCCTGGC	60.391	GTCTGTAGAAGTGGAGCGGC	60.459
comp80663_c0_seq1	(ACA)9	194	TCTCATACAGTGGCGCATTGT	60.066	ACTACTAAAGATGCCAGAATGAACT	58.048
comp80905_c0_seq1	(ATC)7	164	CGAGGTGTTGAGTGAGCTGT	59.967	TCAGAATCAGATACAGAAGGATCAGA	58.934
comp82800_c0_seq1	(TTC)7	144	TGTGAATTGGAGGCCCATGG	60.325	CAGAGAGCCCTGTGTTCCTG	60.037
comp82861_c0_seq1	(AGC)7	138	TTCTAGGTCCTCCGAGTGGG	60.033	ACAAGTGACTGTTTGTAGGAGC	58.532
comp84292_c0_seq1	(TAC)8	239	GGCAGAGCTGGAGACACATT	60.036	ACAAGGCATACTCTGGGTCC	59.088
comp84955_c0_seq1	(CTC)7	139	GACGAAGATGAGGAGGCACC	60.179	CCACCATCTCGGACTGGTC	59.482
comp86569_c0_seq1	(ACC)9	193	AGAGGTGATGCTTCCTTTCCT	58.726	CCTGATGTAGGGAGCATGGAG	59.653
comp87059_c0_seq1	(AAC)9	185	CACGTTGGGTGGAGAGATGA	59.392	TGGCTCGTCTGAACTTGGAG	59.682
comp89004_c0_seq1	(CAA)7	161	AGGAAAGCGGTTAAGGCCTG	60.323	TCTCTGCCACTGGAAGGGTA	59.884
comp89314_c0_seq1	(AGG)7	115	GCCACGACTTGCCGTCT	60.013	AAGTTCGGCTCACACCCTG	59.929
comp89320_c0_seq1	(CAC)8	130	CAGTACCACCAGTGCCACAG	60.604	CCGGGTAGGCGTGGTGC	62.94
comp89969_c0_seq1	(ATT)9	162	GGGTTCTCTCGTGACTGCAA	59.966	GGGTGCTCATCTCAAACCGA	60.036
comp90579_c0_seq1	(GGC)7	206	CGGCGGAGTCTGCGGAG	62.653	GAGGAGGAGCTGGTAGGGAA	60.032
comp90608_c0_seq1	(CAC)8	101	AAGCACCAACACACCATCCA	60.106	CAAGCGGATGGGAGGATGAT	59.601
comp90956_c0_seq1	(CTC)8	155	TGAGTGAATTCCCAACAGCAGT	60.159	GGTTGCTGGGACTTGCCTTA	60.251
comp91865_c0_seq1	(AAC)8	104	AGAAAGTCTGCTTCATTTCTGGT	58.277	GTTGGCAGCAGGAGTAGGAG	60.108
comp92140_c0_seq1	(GTT)8	192	TTGGTGGAGTTGTACTGCCG	60.25	CAGGTGCAAGGCCTTCAACA	61.109
comp93100_c0_seq1	(CGG)7	208	CTAAGCTGCCGCCTGATCTT	60.179	TTCACGCAGGCAGGAATGAT	60.035
comp94373_c0_seq1	(GAG)8	181	GAATCCAACACGAGGCCAGA	60.036	CACGGAGAACAGTTCCACCA	59.894
comp94535_c0_seq1	(AAC)8	185	AGGCTGATACCATCCCATACA	58.01	TGTGAGGATGAATTTCAAGTCCT	57.753
comp95637_c0_seq1	(TCC)7	172	ATGCCAGGGAAACGTCAGTC	60.322	GGGAGTGGAGTGGATGCATT	59.743
comp97843_c0_seq1	(ATA)7	168	CTGGTCCCTCCCTGACTGTA	59.959	AATGTGACCATGGGCAAGCT	60.252
comp98948_c0_seq1	(GGC)8	212	TCCTTGGGCATTTCTCTGGC	60.324	CACCATGTACTCGGGAGCC	59.856
comp100812_c0_seq1	(GTG)8	150	TGCTTTGAGGGCTTTCCGAT	59.962	GTCAGACCCGCGTTCTCTG	60.445
comp101512_c0_seq1	(CTG)7	143	GTCAGCAGAGAAGCCCAGG	60.079	GACAAAGAGCGTCCGGAGTC	60.733
comp103596_c0_seq1	(GCT)9	152	GGCAAGCAGAGACAAGGGAT	60.035	CCAAGTGTCCCTGTCCATCC	60.035
comp104723_c0_seq1	(GGA)10	104	CTCGCTACAAAGGAGGAGGC	60.179	TGAGGCTCTGTGAATGTGGG	59.674
comp105172_c0_seq1	(GGC)8	174	CTCCCTTTATCGCGCTCCTC	60.319	ATCTCTCCACTCTCCGGCTC	60.467
comp107473_c0_seq1	(ACC)7	110	CATGATCCATGGTCCCTCCC	59.597	TTCCTTGCCTCTTGCCCTTT	59.812
comp113962_c0_seq1	(CAG)8	168	CTGAGCACCGTGGTGTAGG	60.08	CTACCACGTGCTCAGCCTG	60.447
comp114271_c0_seq1	(GTT)7	206	CCAGTCAGGCATCCCAAGAA	59.671	ACAGGGTACTACTTGGCTCA	57.679
comp11352_c1_seq1	(AAGG)10	154	GGAAGGAAGGAAGGAAGGAAGT	59.355	TCCTTGCCCTGATGCTTCTC	59.746
comp13091_c0_seq1	(GGAA)10	206	CTAGTGTCGCAAAGGCTGGA	60.037	TCCCACTGCATATGTCTCTGC	59.86
comp15162_c0_seq1	(TCTT)11	221	TTCCAAGGGCACACAGTGAA	59.743	ACAGCTGATGAGGCAACACT	59.601
comp16236_c0_seq1	(TGTT)10	122	ATTCTCCACGGTTTCCAGGC	60.323	TGCATTTAGGGCCTGATTGGT	59.993
comp16516_c0_seq1	(GCCT)13	211	GCATCCCTGGTTCCTCTTCC	60.107	AGGACTTCCCTTAGCCCTGT	59.881
comp17358_c0_seq1	(TGAG)11	239	TCTCTGCCTGCCTCTCTCTC	60.396	AACCATGCTCCCTTGCTCTC	60.035
comp18790_c0_seq1	(CCAT)11	100	GTGCGATCTCTGCTCACTCT	59.545	AGATTGGCATCTGAGGTGGC	60.107
comp18819_c0_seq1	(AAAC)11	110	TCTGTGTCCCTTGAATTTCCA	57.126	AAGCTACCCTTGTCTCACGC	60.037
comp21944_c0_seq1	(ATTC)10	149	GGTGATGAATGAATGATGGTGGG	59.68	TCTGACTTGTGCGCTCCAAA	60.179
comp30770_c0_seq1	(ATAC)10	133	TGGGCAGCTTTCTTCACATGA	60.203	GGAGGCACCAGAGCAATTCT	60.035
comp41412_c0_seq1	(AATA)10	137	GAACGACGCGGACATTGAAG	59.907	CAGCTCCTTCTTAGCCCGAG	59.896
comp45456_c1_seq1	(CACT)10	215	CGTTGCAGACCTCCGATGAT	60.179	TCTTTCTGCAAGACTGGCCC	60.251
comp52214_c0_seq1	(ATCC)11	223	CCCTGGAAAGGCATGCATTG	59.823	CTCACACCAAGCCTGACACT	59.893
comp55979_c1_seq1	(ATTC)10	235	GAGCAGGCCTCTGTCTTTGT	59.964	CCTTGGCCTCTGTCTCTGTG	60.037
comp57640_c1_seq1	(AAAC)10	191	AGAGGTACGCTGCAGATTCG	59.899	CTGAGTCACCTGGGCTGC	60.047
comp58766_c2_seq1	(AGAA)11	180	GTGCTATAGCTCCGAGGGC	59.709	TCTTCCCAGATCAGCCCAGA	59.957
comp59043_c0_seq1	(AAAT)11	225	TGGATCTGTTGTGCTGGAGA	58.649	TCAGTCTTTGCACAGTCTGT	57.012
comp65075_c1_seq1	(CAAA)10	246	TGTCCTTACTGTGAGGAAATGCT	59.672	CTATCATTCACCCGAGCCTCC	59.999
comp65858_c0_seq1	(GAGG)10	230	AGAAACTAAGTGCGGGTGGG	59.964	CTGTGGACTCTGAGCTGAGC	60.109
comp66072_c0_seq1	(CCTG)12	250	AACCTGCAATGGACTCTGCC	60.61	GGGTCTAGGTCTTCACTGCC	59.462
comp67705_c0_seq1	(CAAC)10	132	CCCGGTGTCTTCCTCAGAAC	60.037	AGGTGAGGGAGGTGGAGTTT	60.104
comp70091_c0_seq1	(TTTC)10	150	CCCACGGTATAGGTGTTCGT	59.18	TGCAGAGCACTTCCTGTAGC	60.037
comp73751_c0_seq1	(AAAT)10	195	GGCCACCAGAGCTCAGATTT	60.035	AGCACCAAGGTTGAGAAACC	58.308
comp73936_c0_seq1	(CATT)10	174	ACAGGAAAGGAGTAAGATCTTTCTCT	59.271	GGCTGGCTTAGGGTTCTCTG	60.107
comp74981_c0_seq1	(AAAC)11	207	CCTTCCCTGACCTTGTGCAT	59.961	GGATAAGCTGATGTGCCTCCC	60.544
comp80992_c0_seq1	(GGGC)10	101	CTCCCGAGCGGCGTCTC	62.336	CTCCCTCCCTCCCTTCTCTC	60.106
comp118442_c0_seq1	(GTCT)10	197	GAGGCTTCAGAAGACCTCGC	60.459	TCACAAGTGCGGACCTTGAT	59.604
