# Supplementary material for: Genetic signatures of adaptation revealed from transcriptome sequencing of Arctic and red foxes
Source: BMC Genomics. 2015 Aug 7;16(1):585. doi: 10.1186/s12864-015-1724-9 (PMC4528681; doi:10.1186/s12864-015-1724-9)
Supplement: Additional file 11: — Perl script for the backtranslation of amino acid alignments into nucleotide sequence alignments. [file 12864_2015_1724_MOESM11_ESM.zip]

Archive with 1 entries (1 files):
- 12864_2015_1724_MOESM11_ESM.pl
